# **A single cell spatial temporal atlas of skeletal muscle reveals cellular neighborhoods that orchestrate regeneration and become disrupted in aging**

Yu Xin Wang<sup>1</sup>, Colin A. Holbrook<sup>1</sup>, James N. Hamilton<sup>1</sup>, Jasmin Garoussian<sup>1,2,3</sup>, Mohsen Afshar<sup>1</sup>, Shiqi Su<sup>1</sup>, Christian M. Schürch<sup>1,4,5</sup>, Michael Y. Lee<sup>1,4</sup>, Yury Goltsev<sup>1,4</sup>, Anshul Kundaje<sup>6,7</sup>, Garry P. Nolan<sup>4</sup>, Helen M. Blau<sup>1,8</sup>

1. Baxter Laboratory for Stem Cell Biology, Department of Microbiology and Immunology, Stanford University School of Medicine, Stanford, USA
2. Institute of Sports Medicine Copenhagen, Department of Orthopedic Surgery, Copenhagen University Hospital - Bispebjerg and Frederiksberg, Copenhagen, Denmark
3. Center for Healthy Aging, Department of Clinical Medicine, Faculty of Health and Medical Sciences, University of Copenhagen, Copenhagen, Denmark
4. Department of Pathology, Stanford University School of Medicine, Stanford, USA
5. Present address: Department of Pathology and Neuropathology, University Hospital and Comprehensive Cancer Center Tübingen, Tübingen, Germany
6. Department of Genetics, Stanford University, Stanford, USA
7. Department of Computer Science, Stanford University, Stanford, USA
8. Corresponding author: [hblau@stanford.edu](mailto:hblau@stanford.edu)

Keywords: Skeletal muscle, tissue regeneration, cellular heterogeneity, multiplex imaging, inflammation, stem cell niche, cellular architecture, machine learning

## Highlights

- Single cell resolution spatial atlas resolves a cellular ecosystem of 34 cell types in multicellular neighborhoods that mediate efficient skeletal muscle repair
- Highly multiplexed spatial proteomics, neural network and machine learning uncovers temporal dynamics in the spatial crosstalk between immune, fibrogenic, vascular, nerve, and muscle stem cells and myofibers during regeneration
- Spatial pseudotime mapping reveals coherent formation of multicellular neighborhoods during efficacious repair and the nodal role of immune cells in coordinating muscle repair
- In aged muscle, cellular neighborhoods are disrupted by a chronically inflamed state and autoimmunity

## Abstract (150 words)

Our mobility requires muscle regeneration throughout life. Yet our knowledge of the interplay of cell types required to rebuild injured muscle is lacking, because most single cell assays require tissue dissociation. Here we use multiplexed spatial proteomics and neural network analyses to resolve a single cell spatiotemporal atlas of 34 cell types during muscle regeneration and aging. This atlas maps interactions of immune, fibrogenic, vascular, nerve, and myogenic cells at sites of injury in relation to tissue architecture and extracellular matrix. Spatial pseudotime mapping reveals sequential cellular neighborhoods that mediate repair and a nodal role for immune cells. We confirm this role by macrophage depletion, which triggers formation of aberrant neighborhoods that obstruct repair. In aging, immune dysregulation is chronic, cellular neighborhoods are disrupted, and an autoimmune response is evident at sites of denervation. Our findings highlight the spatial cellular ecosystem that orchestrates muscle regeneration, and is altered in aging.

1           Our longevity depends on the renewal of tissues to meet the challenges of daily physical  
2 and molecular stresses. The repair process is critical for maintaining tissue function throughout  
3 life. Thus, a better understanding of regulatory mechanisms that operate during regeneration and  
4 the dysregulation that results from aging offer significant potential for the design of targeted  
5 therapies to enhance tissue repair and function (Blau and Daley, 2019; Blau et al., 2015; Fuchs  
6 and Blau, 2020).

7           Skeletal muscle accounts for ~40% of our body mass and is subject to the physical stress  
8 of movement. Each muscle group consists of aligned contractile myofibers which are innervated  
9 by motor neurons and attach to bone via tendons. Skeletal muscle tissue is highly vascularized  
10 due to the metabolic demand of muscle contractions. In most scenarios, muscle damage incurred  
11 during exercise or injury such as muscle strains is efficiently repaired, and contractile function is  
12 restored. The repair of myofibers is carried out by muscle stem cells (MuSCs), also known as  
13 satellite cells (Blau et al., 2015; Relaix and Zammit, 2012; Wang and Rudnicki, 2012). MuSCs  
14 remain dormant in a quiescent state and respond to injury by proliferating to generate a pool of  
15 myogenic progenitors which fuse to form new myofibers (Dumont et al., 2015). However, in  
16 aging, muscles atrophy. This leads to molecular dysregulation that disrupts the signals that  
17 instruct MuSCs to proliferate and orchestrate the complex cellular symphony that underlies the  
18 regenerative process, resulting in fatty-fibrotic scarring and progressive replacement of muscle  
19 cells (Blau et al., 2015; Mann et al., 2011; Muñoz-Cánoves et al., 2020). This regenerative deficit  
20 exacerbates the muscle loss seen with aging.

21           The niche, or stem cell microenvironment, is a critical determinant of the regenerative  
22 response (Fuchs and Blau, 2020). Single cell analysis (De Micheli et al., 2020a; Giordani et al.,  
23 2019; Porpiglia et al., 2017) and genetic ablation approaches (reviewed in Bentzinger et al.,  
24 2013a; Fuchs and Blau, 2020) have suggested the requirement for coordinated interactions  
25 between cell types to carry out repair. The yin and yang function of immune cells is highlighted  
26 by their critical role in normal repair, and their disruption of muscle function in inflammatory  
27 myopathies, dystrophies, and aging. When transient, proinflammatory signals and macrophage  
28 recruitment initiate the wound-healing response and activate MuSCs. This process is carefully  
29 regulated, as persistent immune responses in muscles afflicted with muscular dystrophy and  
30 systemic changes in inflammatory cells and cytokines in advanced age, through a process termed  
31 “inflammaging” (Ferrucci and Fabbri, 2018), are associated with progressive fibrotic

32 accumulation and progressive loss of muscle function. These studies suggest that cells reside in a  
33 delicate regenerative ecosystem in which complementary, interconnected, and interdependent  
34 relationships with other cell types are essential to carry out their programmed function in  
35 rebuilding the tissue.

36 Despite this knowledge, there are major gaps in our understanding of the ecosystem  
37 underlying the process of regeneration and of aging, largely due to limitations in currently used  
38 technologies. For example, cell-cell interactions cannot be assessed by methods that require  
39 tissue dissociation, such as flow cytometry, CyTOF, or single cell RNA-sequencing. Critical  
40 information is lost, for instance about changes to the niche, a microenvironment in which  
41 spatially localized cell-cell signaling and extracellular matrix (ECM) interactions are key to  
42 efficacious regeneration. Spatially restricted regulators likely determine cell migration behavior  
43 and fate (Bentzinger et al., 2013; Blau et al., 2015; Fuchs and Blau, 2020; Wang and Rudnicki,  
44 2012). On the other hand, traditional histological methods, in which cell integrity within tissues  
45 is maintained intact, suffer from the limited capability of visualizing only 3-4 proteins  
46 simultaneously due to secondary antibody cross-reactivity and spectral overlap. Thus, most  
47 currently used methods fail to reveal the complexity of spatially localized interactions of diverse  
48 cell types, the ECM, and secreted molecules that mediate regenerative regulatory mechanisms.

49 Here we overcome this limitation by employing multiplex imaging to simultaneously  
50 profile the spatial distribution of cell surface, intracellular and ECM proteins during skeletal  
51 muscle regeneration and aging in mice. We explore the interplay of the plethora of cell types that  
52 spring into action to restore the complex architecture of skeletal muscle tissues after injury. We  
53 developed analytic tools that utilize neural networks to identify tissue features and unsupervised  
54 clustering for identifying 34 cell types at single cell resolution to build a single cell spatial atlas  
55 of muscle regeneration and of aging, tools that will serve as a resource for similar studies in other  
56 tissues. We uncover positional information and the temporal dynamics of intercellular crosstalk  
57 between immune, fibrogenic, vascular, nerve, and myogenic cells at sites of injury and repair,  
58 and their relationship to the extracellular matrix in multicellular neighborhoods. We employ  
59 methods we developed for spatial pseudotime mapping to build a regeneration clock of cell  
60 interactions and how they change over time, an unbiased metric of the repair process. This  
61 analysis uncovers a nodal role for immune cells in efficacious muscle regeneration and in the  
62 disruption of the cellular ecosystem that accompanies aging. Finally, our atlas not only provides

63 single cell resolution tissue architecture of skeletal muscle and a holistic overview of cell-cell  
64 interactions that underly muscle repair and aging, but also provides a roadmap for using neural  
65 network and unsupervised clustering approaches to understand complex changes in cellular  
66 neighborhoods that underly biological processes in a wide range of tissues.

67

## 68 **Results**

### 69 **Identification and validation of a skeletal muscle cell regeneration antibody panel**

70 We aimed to create a comprehensive atlas detailing how distinct cell subtypes contribute  
71 to muscle regeneration after injury. To date, our knowledge of the temporal dynamics of the  
72 various cell types that participate in muscle repair derives from techniques that dissociate the  
73 tissue like flow cytometry, CyTOF, and single cell RNAseq (Bentzinger et al., 2013; De Micheli  
74 et al., 2020b, 2020a; Giordani et al., 2019; Petrany et al., 2020a; Porpiglia et al., 2017), which  
75 lack information regarding spatial relationships and cell-cell interactions. Histological studies  
76 that retain the tissue intact have suffered from limitations due to the inability to simultaneously  
77 visualize more than ~4 markers simultaneously due to spectral overlap of fluorophores using  
78 immunofluorescence. While current spatial transcriptomics approaches offer insights into  
79 cellular relationships in situ, they are currently limited by low resolutions (~10-50um) that  
80 cannot truly resolve single cells and lack the ability to resolve how cells interact with the ECM.  
81 Here we overcame these limitations by using CO-Detection by indEXing (CODEX; Fig. 1B), a  
82 high resolution method that allows up to 60 protein markers to be visualized simultaneously by  
83 iterative probe binding and microscopy in a single tissue section (Goltsev et al., 2018; Kennedy-  
84 Darling et al., 2021; Schürch et al., 2020). As a result, the diverse cell types involved in  
85 efficacious regeneration can be definitively identified. This is achieved by a combination of  
86 multiplex imaging and localized protein profiling which resolves the temporal progression of the  
87 various cell subtypes and their spatial organization that are inherent to efficacious skeletal  
88 muscle regeneration.

89

### 90 **Spatial profiling of regenerating skeletal muscle by multiplex imaging**

91 We induced muscle injuries by intramuscular injections of notexin (NTX), a well  
92 characterized myotoxin that causes local myofiber damage, and monitored changes in cell-cell  
93 relationships using CODEX in transverse tissue sections over a 10-day time course during which

94 the injury is repaired (Fig. 1A). NTX damage models a grade 2 muscle strain that occurs in  
95 sports or traumatic injuries, where muscle tears but does not undergo complete rupture (Pollock  
96 et al., 2014). To construct a CODEX antibody panel that encompasses all cell lineages, we  
97 combined previously reported cell type-specific markers (Bentzinger et al., 2013) with additional  
98 markers identified by single cell analysis of muscle (De Micheli et al., 2020a; Giordani et al.,  
99 2019; Porpiglia et al., 2017). This panel identifies myogenic, immune, vascular, fibrogenic, and  
100 motor neuron cells and their functional subsets (Fig. 1C). To distinguish a progression of  
101 myogenic cell states, we used established markers: MuSCs (Pax7), proliferating myoblasts  
102 (MyoD and Ki67), committed myocytes (myogenin (MyoG)), myotubes (embryonic myosin  
103 heavy chain; eMyHC) and myofibers (dystrophin (DMD) and adult myosin heavy chain (MyHC))  
104 (Bentzinger et al., 2012; Silberstein et al., 1986). We used well characterized markers to  
105 distinguish immune cell types of the myeloid lineage: monocytes (CD11b), neutrophils and  
106 granulocytes (CD11b and Ly6G), macrophages (CD11b and F4/80) and dendritic cells (CD11b,  
107 CD11c, and class II major histocompatibility complex (MHC-II)) (De Micheli et al., 2020a;  
108 Giordani et al., 2019). We further distinguished macrophages by expression of CD16/32 (FcR)  
109 on FcR<sup>+</sup> macrophages (Fitzer-Attas et al., 2000) and CD163 on M2 macrophages (Hu et al.,  
110 2017) that distinguish these subsets from M1 macrophages. To differentiate immune cell types of  
111 the lymphoid lineage we used established markers for B cells (B220) and T cells (CD3 and  
112 CD90) (Bendall et al., 2011). Within the T cell population, CD4 was used to identify T Helper  
113 and T Regulatory cells, and distinguish them from CD8 marked cytotoxic T cells. We were also  
114 able to identify multiple vascular cell subtypes in the muscle tissue, including endothelial cells  
115 (CD31 and Sca1) and smooth muscle cells (a7-integrin (a7-int) and b1-integrin (CD29)). We  
116 used CD9 to mark the Schwann cells surrounding the motor neurons that innervate muscle tissue  
117 (Anton et al., 1995). To capture the fibrosis that is a feature of damaged tissue, we identified  
118 fibroadipogenic progenitors (FAPs) by their expression of PDGFR $\alpha$  and Sca1 (Joe et al., 2010;  
119 Uezumi et al., 2010). Tenocytes comprise the tendons that connect the muscles to the bones and  
120 were identified by tenomodulin (TNMD) (Docheva et al., 2005; Giordani et al., 2019). Finally,  
121 we visualized the tissue ECM that provides structural and biochemical support to the tissue  
122 (laminin and reticular collagen (ERTR7)). To mark the regions of damage, we included IgM  
123 which has been shown to bind to damaged, necrotic myofibers (Petrany et al., 2020b). We  
124 validated our antibody panel by ensuring that cell subtypes co-expressed multiple markers (e.g.,

125 co-staining of macrophages by CD45, CD11b and F4/80) and that distinct cell type subsets were  
126 clearly identifiable based on detection of unique markers (e.g., pericytes were distinguished by  
127 CD90 expression). Multiplexed detection of this array of antibodies allowed us to resolve  
128 specific from non-specific signal that can be detected by certain antibodies (as described in the  
129 limitations section) and discern temporal changes in antibody intensity and localization (Fig. S1).  
130 Together, this spectrum of antibodies enabled resolution of the dynamic alterations in the  
131 abundance and organization of various cell types throughout the regeneration time course.

132

### 133 **Deep learning to map regenerating muscle**

134 Multiplex imaging benefits from sub-micrometer resolution (20x magnification;  
135 0.377 $\mu$ m/pixel), but generates massive amounts of data per experiment. To analyze this large  
136 dataset, we developed a set of computational tools to register and stitch images obtained from  
137 automated microscopes across imaging cycles, identify and segment single cells from the  
138 stitched images, and classify identified cells based on antibody staining (Fig. 2A and S2).

139 We developed the CRISP image processing pipeline (Palla et al., 2021) to align and  
140 register our CODEX images in 3D at sub-pixel resolution. The improved image alignment and  
141 stitching CRISP provides enhanced our ability to perform in silico tissue clearing (remove  
142 autofluorescence signal) and reduced imaging artifacts. Once our images were registered,  
143 stitched, and cleared, we leveraged the exceptional image recognition abilities of convolutional  
144 neural networks (CNNs) to segment cells and tissue features. We used CellSeg, a CNN trained  
145 for the segmentation of nuclei (Lee et al., 2022), to generate masks of each nucleus and quantify  
146 the intensity of staining of each antibody within the nuclear and perinuclear compartments (Fig.  
147 S3A).

148 While CellSeg allowed us to characterize many of the features of our tissue, its reliance  
149 on single nuclei data complicates its use in analyzing the large multinucleated myofibers and  
150 ECM structures characteristic of muscle tissue. To solve this issue, we created FiberNet, a CNN  
151 trained to recognize muscle fiber states (healthy, injured, and regenerating myofibers) and  
152 features marked by ECM (ECM scaffolds, motor neurons, and stroma) in fluorescence images  
153 (Fig. 2B). We defined “healthy muscle fibers” as those that expressed mature MyHC and  
154 dystrophin (DMD). By contrast, “injured” myofibers (labelled by IgM) exhibited a loss of DMD  
155 and  $\alpha$ 7-int due to the destructive effect of notexin on the sarcolemma. The ECM remained intact,

156 providing a reference of the location of the myofiber prior to damage. This provided a scaffold-  
157 like structure encompass a range of cell types including eMyHC+ differentiating myotubes  
158 resided after IgM+ injured myofibers were removed. As regenerating myofibers matured, they  
159 decreased expression of eMyHC and began expressing DMD. The ECM was significantly  
160 thicker around regenerating myofibers and exhibited increased staining for ERTR7. In addition,  
161 ECM markers identify complex structures such as connective tissue of stromal regions and motor  
162 neuron tracts. Remarkably, FiberNet identifies each of these features with ~98% accuracy (Fig  
163 2C).

164

### 165 **Cellular heterogeneity and dynamics of skeletal muscle regeneration**

166 We first used previously charted notexin injury regeneration timecourses to validate our  
167 time course of regeneration and progression of myofiber states (Bentzinger et al., 2013; Hardy et  
168 al., 2016; Morton et al., 2019). Quantification of muscle cross sections after injury revealed that  
169 1 day after injury ~80-90% of muscle fibers were damaged (Fig. S3B). ECM scaffolds devoid of  
170 IgM+ injured myofiber debris were transiently detected at day 3 before regenerating myofibers  
171 formed at day 6. By day 10 post injury, newly formed myofibers increased in size and returned  
172 to a healthy state.

173 Using CODEX we were able to gain an in-depth view of the dynamic changes of cell  
174 subsets and their interplay during regeneration after injury at a single cell resolution (Fig. 2B).  
175 We sought to classify single cells in the tissue into cell types based on their antibody staining  
176 patterns. The automated identification of cell types from imaging data remains a computational  
177 challenge. Unlike high-throughput sequencing approaches, multiplex imaging approaches have  
178 lower dimensionality, suffer from imaging artifacts, and exhibit variable tissue autofluorescence  
179 all of which contribute to poor performance in clustering algorithms. To overcome these  
180 limitations, we developed a high-fidelity clustering pipeline (HFcluster) that is optimized for  
181 multiplexed imaging and immunofluorescence data. HFcluster is unique in that it overcomes the  
182 contribution of non-specific signals and other noise while clustering by first learning potential  
183 cell types in the tissue using the antibody staining patterns of cells with robust signal and then  
184 propagating those identities onto cells with lower signal that share similar staining patterns (Fig.  
185 S3C). We further improved our clustering by integrating tissue feature classifications from our  
186 FiberNet algorithm, which facilitated the classification of myofiber states. Using this approach,



187 we identified 34 distinct cell subsets that matched the expected combination of markers defined  
188 by our selected panel of antibodies (Fig. S4; additional details in Supplementary Methods).  
189 Clustering results were consistent across tissues, time points and experimental batches (Fig. S4).  
190 Since each cell was indexed with its spatial coordinates, we were able to generate a single cell  
191 resolution atlas of skeletal muscle regeneration which includes the positional information for  
192 each of the 34 distinct cellular subsets throughout the time course of muscle regeneration (Fig.  
193 2D). A progression from intact myogenic cells was followed on day 2 of injury by a dramatic  
194 influx of immune cells, followed on day 3 by an increase in endothelial and vascular cell types,  
195 which increased on day 6 and resolved on day 10 as muscle regeneration nears completion.  
196 Interestingly, while FiberNet classified regenerated myofibers at day 10 as healthy, many of  
197 these fibers showed higher DMD expression than in uninjured muscle, thus suggesting longer  
198 lasting molecular differences in regenerated myofibers (Fig. 2C-D).

199 We identified several endothelial cell (EC) subsets distinguished by marker expression  
200 and spatial localization. We detected a range of expression of CD38, Sca1, and CD47 on other  
201 ECs (Fig. S4). Interestingly, our data reveal that CD38, a cell surface nicotinamide adenine  
202 dinucleotide nucleosidase, specifically marks capillary ECs but not the ECs of larger blood  
203 vessels (Fig. 1D, S4 and S5A). After injury, expression of CD38 in capillary ECs correlated with  
204 the presence of the red blood cell marker Ter119, suggesting a relationship with capillary  
205 perfusion (Fig. S4, S5B-C). CD38<sup>+</sup> ECs markedly decline in the injured areas of day 3 muscles  
206 (Fig. 2E). By day 6 and 10, CD38<sup>+</sup> capillary ECs are found in regions with DMD<sup>high</sup> myofibers  
207 but not in regions that continue to express embryonic myosins (Fig S5B-C). These findings  
208 suggest that CD38 expression in ECs is restricted to perfused capillaries, revealing previously  
209 uncharted changes to tissue perfusion and angiogenesis during late stages of muscle repair.

210 We quantified each cell type subset across the regeneration time course to discern the  
211 temporal dynamics of changes in cell composition that occur during regeneration (Fig. 2E). Our  
212 analysis revealed that as muscle tissues transition through regeneration, there is a continuous flux  
213 of functional subsets of myogenic, immune, vascular and fibrogenic cellular lineages. Cellular  
214 composition is distinct at each time point (Fig. S4), and matches previously established dynamics  
215 of myogenic differentiation, and innate and adaptive immune responses as quantified by methods  
216 entailing tissue dissociation (Bentzinger et al., 2013; De Micheli et al., 2020a; Giordani et al.,  
217 2019; Porpiglia et al., 2017; Tidball, 2017).

218           Since the abundance of specific cell subsets is in constant flux (Fig. 2E), we sought to  
219 capture the transient states of tissue regeneration through the composition of cells in each tissue  
220 and determine the overlap of subsets at each time point. Using our single-cell cell type data from  
221 CODEX and Uniform Manifold Approximation and Projection (UMAP), a dimension reduction  
222 technique (McInnes et al., 2020), we assessed the compositional similarity of each tissue. This  
223 analysis revealed that regeneration time points can be distinguished by the relative abundance of  
224 cell subsets within each tissue (Fig. 2F). We found that cell types in uninjured, day 1, day 3, and  
225 day 6 samples were largely non-overlapping (Fig. 2G). Day 3 tissues contained the largest  
226 diversity of subsets and shared common cell types with day 1 and day 6 tissues (Fig. 2G). Day 10  
227 tissues contained the most subsets in common with uninjured tissues but still contained  
228 regenerating cell types in common with day 6 tissues (Fig. 2G). These data outline a temporal  
229 cellular composition regeneration trajectory that culminates in a near return to an uninjured state  
230 (Fig. 2F). They also provide insights into the cell type composition at the tissue level that can be  
231 used to gauge the regeneration status of the muscle. Together, these findings establish a high  
232 resolution temporal spatial atlas of muscle regeneration and suggest distinct temporally  
233 determined cellular functions.

234

### 235 **Defining cellular neighborhoods of regenerating muscle**

236           We noted that some cellular subtypes from distinct cellular lineages displayed correlated  
237 dynamics, which led us to postulate that they co-exist in cellular neighborhoods. For example,  
238 there is an inverse correlation of cell types between healthy myofibers and injured myofibers  
239 (Fig. 3B). Thus, spatial relationships between pairs of cell types are often directional, and an  
240 enrichment of cell types in the vicinity of each other suggests grouping or dispersion dynamics,  
241 and that inter-lineage regulation between these distinct cell subtypes can occur. This finding fits  
242 well with findings by others that cells are known to organize into cellular neighborhoods  
243 through chemoattractant or chemorepellent signals (Goltsev et al., 2018; Schürch et al., 2020)  
244 and reside in niches that depend on the presence or absence of other cells (Fuchs and Blau, 2020).

245           To gain insights into the spatial arrangement of cell types in cellular neighborhoods of  
246 regenerating muscle, we analyzed the co-occurrence of cell subsets (neighbors), quantifying  
247 grouping and dispersion relationships between cell type pairs (Fig. 3A). We defined the largest  
248 set of cell-cell interactions around injured myofibers (Fig. 3B). Pairwise interaction analysis

249 revealed clusters of spatially enriched cell types that correspond to regenerative processes (Fig.  
250 3B), including clusters of interactions driven by injured myofibers, adaptive immune cells,  
251 vasculature, regenerating myotubes, and healthy myofibers, as well as a cluster of other  
252 interactions involving M2 macrophages, MuSCs and CD38+ ECs.

253 Injured myofibers exhibited reciprocal attractive relationships with early inflammatory  
254 cell types including neutrophils and M1 macrophages (Fig. 3C, top left). Cycling ECs, FAPs, and  
255 myogenic progenitors (myoblasts and myocytes) were also enriched in the vicinity of injured  
256 muscle fibers, suggesting that factors released at the site of injury may facilitate the cell cycle re-  
257 entry of muscle resident stem cells (Fig. 3C, top left). Consistent with a previous report (Verma  
258 et al., 2018), we identified an enrichment of CD38+ capillary ECs in the vicinity of MuSCs,  
259 suggesting that these cells are a part of the MuSC niche. However, the enrichment is  
260 unidirectional, MuSCs are not enriched in the vicinity of CD38+ capillary ECs, indicating  
261 CD38+ ECs do not require MuSCs in their niche (Fig. 3B-C).

262 In other neighborhoods, we uncovered changes in the interaction of immune, vascular,  
263 and stromal in response to injured myofibers, as well as temporally distinct supportive cell types  
264 that co-occur with subsets of myogenic cells in neighborhoods in which new myofibers are being  
265 formed. Neutrophils and macrophages (M1 and FcR+ subsets) mount an innate immune response  
266 to injury (Fig. 3C, top middle). These myeloid subsets largely associate with each other, recruit  
267 monocytes, and interact with dendritic cells (Fig. 3C, top middle). While most infiltrating  
268 immune cells are myeloid in accordance with an innate immune response, the accumulation of  
269 IgM in injured myofibers is consistent with an antibody mediated adaptive immune response.  
270 Indeed, injured myofibers were enriched in neighborhoods comprised of a subset of CD9+  
271 dendritic cells and IgM+ plasma cells (Fig. 3C, bottom middle). Dendritic cells and CD9+  
272 dendritic cells interacted with B cells and T cells in lymphoid aggregates that form around  
273 regenerating myofibers at day 6 after injury (Fig. 3C, bottom middle). Myogenic progenitors  
274 (myoblasts and myocytes) are associated with M1 macrophages and cycling endothelial cells  
275 typical of an early regenerative state, whereas fused myotubes and regenerating myofibers are  
276 associated with fibroblasts, tenocytes, and smooth muscle cells (Fig. 3C, bottom left and right)  
277 characteristic of a later regenerative state.

278 A common feature of a later regenerative phase and uninjured muscle is that among  
279 immune cell interactions is that they all show repulsion dynamics with regenerating myofibers

280 and mature myofibers (DMD<sup>high</sup> and healthy subsets) (Fig. 3C, middle panels), indicating that the  
281 presence of mature myofibers suppresses inflammatory cell types. Similarly, most vascular and  
282 fibrogenic cell subsets exhibit repulsion dynamics with myofibers except for CD38<sup>+</sup> ECs (Fig.  
283 3C, top and bottom right). This finding underscores the known association of capillary CD38<sup>+</sup>  
284 ECs intertwined with the myofibers in the muscle vasculature. It also highlights the known anti-  
285 fibrotic effects of myofibers on FAP differentiation (Joe et al., 2010; Uezumi et al., 2010;  
286 Wosczyzna et al., 2019). Additionally, our analysis established that motor neuron-associated  
287 Schwann cell neighborhoods are enriched in M2 macrophages and accompanying vessels  
288 consisting of ECs (CD38<sup>-</sup>), which supply the nerve with nutrients (Fig. 3C, bottom right). These  
289 cell-cell interaction dynamics point to coordinated temporally regulated cellular interactions that  
290 occur in series during muscle regeneration. Specifically, injury triggers inflammation and stem  
291 cell activation, that in turn recruits additional cell types, which promote differentiation in a  
292 coordinated cascade of events entailing precisely orchestrated changes in cellular neighborhoods.  
293

#### 294 **Cells that traverse the myofiber basal lamina during regeneration**

295 ECM structures like the basal lamina can act as barriers, allowing only select cell types to  
296 traverse them. Since ECM scaffolds are comprised of structural proteins that are destroyed upon  
297 dissociation, the ability of cell types to traverse the ECM scaffold has remained elusive. While  
298 such scaffolds have been visualized previously by electron microscopic and intravital imaging  
299 (Vracko and Benditt, 1972; Webster et al., 2016), CODEX imaging allows us to capture the  
300 heterogeneous population of cells within these ECM scaffolds during regeneration (Fig. 2A, 3D,  
301 and S6A). In longitudinal sections along the length of the muscle, CODEX reveals ECM  
302 scaffolds as tracts outlined by precisely aligned reticular collagen fibrils (stained by ERTR7; Fig  
303 3D, top; and S6A) which accumulate IgM<sup>+</sup> debris from injured myofibers replete with  
304 infiltrating CD45<sup>+</sup> immune cells (Fig. 3D, middle). This contrasts with the localization of  
305 PDGFR $\alpha$ <sup>+</sup> FAPs, which are mostly found outside the ECM scaffolds (Fig. 3D, middle),  
306 presumably because the ECM acts as a barrier to these cells.

307 To gain further insights into cellular heterogeneity within ECM scaffolds and  
308 relationships between cell types that traverse the ECM, we quantified cell subsets found in ECM  
309 scaffolds and assessed their co-occurrence at each stage of regeneration. Cells were mapped  
310 based on their spatial location relative to the ECM scaffold, enumerated and identified by

311 FiberNet, then clustered by similarity of cellular composition (Fig. S6B). As expected, M1  
312 macrophages were the major cell type found within ECM scaffolds. M1 macrophages were  
313 associated with small numbers of other cell types such as monocytes, other macrophage subsets,  
314 dendritic cells (DCs), fibroblasts, and regenerating myofibers (Fig. S6B-C). The differential  
315 localization of the myeloid cell population was further resolved based on marker expression (Fig.  
316 3D, bottom). While CD11b<sup>+</sup> myeloid cells were found both inside and outside of ECM scaffolds,  
317 many M1 macrophages (F4/80<sup>+</sup> CD163<sup>-</sup>) but few CD163<sup>+</sup> M2 macrophages were found inside  
318 the ECM scaffolds. F4/80<sup>+</sup> CD11c<sup>+</sup> cells were observed inside ECM scaffolds at day 6,  
319 suggesting a process of differentiation from macrophages to dendritic cells. Additional cell types  
320 such as Ly6G<sup>+</sup> neutrophils, CD31 ECs, and myogenic progenitors were also found within ECM  
321 scaffolds at different time points (Fig. S6A). These results suggest that the ECM scaffold is at  
322 times a highly dynamic environment where cells readily migrate across the residual endomysium  
323 and basal lamina of the myofiber after injury.

324 Clustering analysis identified distinct ECM scaffolds that were either predominantly  
325 populated by myoblasts or by MuSCs and MyoG<sup>+</sup> myocytes (Fig. S6C; clusters 27 vs. 21),  
326 consistent with contact mediated feedback on MuSC self-renewal from differentiating myocytes.  
327 Temporally, neutrophil-dominant and M1 macrophage-dominant ECM scaffolds appeared on  
328 day 1, became macrophage-dominant by day 3 and macrophage-derived DC-dominant by day 6  
329 (Fig. S6D-E). Most other clusters that contained primarily non-macrophage cell types appeared  
330 at later regeneration time points after day 3, suggesting that M1 macrophages facilitate the transit  
331 of other cell types into the ECM (Fig. S6E).

332

### 333 **M1 macrophages clear the way for muscle repair**

334 Macrophages play a critical role in tissue repair and signal to other support cells to  
335 coordinate their functions (Arnold et al., 2007; Brigitte et al., 2010; Chazaud et al., 2003; Du et  
336 al., 2017; Ratnayake et al., 2021; Shang et al., 2020; Tidball, 2017). Our pairwise interaction  
337 analysis indicated that M1 macrophages are enriched near ECM scaffolds (Fig. 3C, bottom right)  
338 and M1 macrophages are the predominant cell type that traverses ECM scaffolds (Fig. S6B).  
339 Moreover, the presence of M1 macrophages is largely mutually exclusive with other cells that  
340 traverse the ECM scaffolds, suggesting that M1 macrophage activity could be a rate limiting step.

341 Thus, we hypothesized that a major function of macrophages within the ECM scaffold is to pave  
342 the way for myogenic cells to carry out regeneration.

343 To test this hypothesis, we performed intramuscular injections of clodronate liposomes to  
344 deplete macrophages locally in muscles at day 2 after injury and assessed regeneration dynamics  
345 by CODEX multiplex imaging (Fig 3E). While we were unable to deplete all M1 macrophages,  
346 the number of M1 macrophages within the myofiber basal lamina was significantly reduced.  
347 Consistent with this reduction, the number of M1 macrophage dominated ECM scaffolds was  
348 diminished on day 3 and cell type dynamics were aberrant (Fig. S6E-F). In accordance with our  
349 hypothesis that M1 macrophage traversal across the myofiber basal lamina is required to remove  
350 injured myofibers, clodronate treated samples contained IgM+ injured myofiber debris even at  
351 day 10 (Fig. 3E and S6A). M1 macrophages eventually infiltrated the muscle, however,  
352 regeneration was significantly delayed (Fig 3E and 3G). Clodronate treated muscles at day 6 had  
353 50% fewer and smaller caliber regenerating myofibers (Fig. 3G). We also observed that  
354 myogenic differentiation was stalled, as there was an increase in ECM scaffolds containing  
355 MuSCs and myocytes at day 6 and fewer scaffolds contained mature regenerating myofibers at  
356 days 6 and 10 (Fig. S6F; clusters 21, 5 and 18, respectively). The regenerating myofibers found  
357 in clodronate treated muscles at day 10 were abnormal in their organization due to a persistence  
358 of myofiber debris post-injury which acted as a physical barrier preventing proper fusion of  
359 myocytes and constraining hypertrophic growth (Fig. 3E). These regenerating myofibers  
360 exhibited a 25% reduction in minimum diameter and did not reach a mature state, resulting in 60%  
361 fewer regenerated healthy muscle fibers by day 10 (Fig. 3G and S6B). Additionally, the loss of  
362 M1 macrophages allowed for an increase in traversal of fibroblasts across the basal lamina at day  
363 6 and DCs at day 10 (Fig. S6E-F), suggesting that early M1 macrophage loss has a broad impact  
364 on the entire cellular response of the regenerating microenvironment.

365

### 366 **The M1 macrophage is a nodal regulator of regeneration**

367 Having established that removal of M1 macrophages from the regenerating  
368 microenvironment caused significant delays in the repair process (Fig. 3E-H), we sought to  
369 characterize the extent and mechanism of the delay by quantifying the cell types present in the  
370 tissue across time to impute a “regeneration pseudotime”. Most of the cell subsets present during  
371 a normal regeneration time course appeared transiently. To this end, we encoded each cell in the

372 tissue with the average timepoint at which it appeared. We calculated a local tissue pseudotime  
373 by averaging encoded times for each cell in specific tissue regions marked by a 75 x 75  $\mu\text{m}$  grid  
374 (Fig. 4A,B). We compared this local regeneration pseudotimes with the post-injury time point of  
375 tissue collection (Fig. 4A,C). Using this approach, we were able to accurately distinguish injured  
376 and uninjured areas and predict the relative regeneration time of the injured regions (Fig. 4B).  
377 This pseudotime analysis also allowed us to visualize and quantify localized delays in  
378 regeneration at day 6 and 10 induced by macrophage depletion instigated by clodronate  
379 treatment of muscles (Fig. 4C).

380 We investigated whether the delay in regeneration after macrophage depletion could be  
381 due to a blockade in cellular progression through a normal regeneration program or via an  
382 alternative non-productive program. Since macrophage depletion by clodronate treatment  
383 disrupts myofiber regeneration and impacts a range of cell types that normally traverse the ECM  
384 (Fig 3G,H and S6F), we hypothesized that localized disruptions in key cell effectors like  
385 macrophages could further alter the spatial arrangements of cells and the timing of the normal  
386 regenerative program. To assess this, we performed a spatiotemporal cell neighborhood analysis,  
387 clustering the local co-occurrence of cell subsets during the regeneration time course. We  
388 identified 26 spatial neighborhood clusters with distinct cell type compositions (Fig. 4D). When  
389 we then cluster these spatial neighborhoods by temporal enrichment to determine which ones  
390 appear in a temporally regulated manner, we find 10 temporal clusters that change in abundance  
391 across the regeneration time course (Fig. 4D,E). These temporal clusters represent unique cell-  
392 cell interaction neighborhoods that occur during regeneration: healthy muscle, perivascular,  
393 neutrophilic infiltration, early and late innate immune response, adaptive immune response, and  
394 de novo myogenesis cell-cell interaction neighborhoods (Fig. 4D,E).

395 To determine if the delay in regeneration we observe after macrophage depletion arises  
396 from a block to the normal regeneration program or from an alternative non-productive program,  
397 we performed spatiotemporal clustering on our clodronate treated samples and compared cell-  
398 cell neighborhoods and their temporal appearance within the neighborhoods. If macrophage  
399 depletion merely delayed the normal regenerative process, we would expect the local  
400 compositions of cells after clodronate treatment to match those seen during normal regeneration.  
401 However, our cell neighborhood analysis revealed a cell neighborhood (spatial neighborhood 7)  
402 that was unique to clodronate treated samples (Fig. 4D,E). The aberrant neighborhood contained

403 a disorganized conglomeration of injured myofibers, myogenic cell subsets characteristic of all  
404 stages, innate and adaptive immune cells, and fibroblasts (Fig. 4D,E), which normally appear in  
405 a precisely orchestrated sequence during normal regeneration (Fig. 4D). To quantify the extent of  
406 the deviation, we measured the pseudotime variance of cells in clodronate treated muscles within  
407 gridded tissue regions and compared our results to the pseudotime variance we determined  
408 during normal regeneration (Fig. 4A,F,G). We found that injured areas of normally regenerating  
409 muscle had low pseudotime variance, suggesting that normal regeneration is a temporally  
410 cohesive cellular process (Fig. 4F,G). In contrast, in clodronate treated samples pseudotime  
411 variance by day 6 and 10 was significantly increased. This is consistent with our cellular  
412 neighborhood analysis. These results suggest that macrophage depletion not only disrupts the  
413 progression of various cell types through the regeneration program, but also triggers the  
414 formation of aberrantly regenerating regions that contain cells that do not normally co-exist at  
415 the same time (Fig. 4F,G).

416 To gain an in-depth understanding of the aberrant regenerative process triggered by  
417 macrophage depletion, we assessed changes in the progression of specific immune, myogenic,  
418 vascular, and fibrogenic cell subsets in clodronate treated samples. We observed universal tissue  
419 disruption, marked by significant changes in cell subtype abundance across multiple lineages at  
420 all time points (Fig. 4H). In clodronate-treated muscles at day 3 after NTX, we observed  
421 increases in the numbers of neutrophils ( $p=0.03$ ) that are normally resolved by day 3, yet also  
422 increases in FcR<sup>+</sup> macrophages ( $p=0.01$ ) and macrophage-derived DCs ( $p<0.01$ ) that normally  
423 become abundant at day 6, providing evidence of a temporally aberrant accumulation of myeloid  
424 subsets (Fig. 4H). In addition, compared to untreated day 3 samples, the abundance of MyoD<sup>+</sup>  
425 MyoG<sup>+</sup> myoblasts and CD38<sup>+</sup> ECs also increased by 2.4 ( $p<0.02$ ) and 1.5-fold ( $p<0.02$ ),  
426 respectively, indicating that macrophage depletion profoundly impacts the abundance of cells of  
427 other lineages (Fig. 4H).

428 These early changes coupled with the accumulation of dead myofiber debris that prevents  
429 proper myocyte fusion precipitates changes in additional cell types (Fig. 4H). We observed  
430 significant increases in DCs ( $p<0.005$ ) and the appearance of a novel CD9<sup>+</sup> DC population  
431 ( $p=0.001$ ) by day 10. MuSC and MyoG<sup>+</sup> myocyte abundance also increased at day 6 and 10  
432 ( $p=0.001$  and  $0.0040$ ; and  $p=0.0065$  and  $0.0226$ , respectively). Coupled with the sustained  
433 presence of regenerating myofibers ( $p=0.001$ ) and a loss of DMD<sup>high</sup> myofibers ( $p=0.001$ ) at day



434 10, these findings are consistent with a delay in myotube maturation. Fibroblast abundance at  
435 day 6 ( $p=0.0043$ ) was also decreased; this is consistent with our pairwise interaction analysis  
436 where fibrogenesis is coupled with myofiber maturation during regeneration.

437 Together, our data suggest that M1 macrophages play a pivotal role in coordinating  
438 regeneration. Upon their depletion by clodronate treatment, a block in phagocyte function creates  
439 a physical barrier to regeneration, which in turn triggers widespread disruption to the standard  
440 regeneration progression of immune, myogenic, fibrogenic, and vascular cell subtypes. These  
441 changes, in turn, disrupts regenerative cell neighborhoods, temporally desynchronizing  
442 regeneration, and accelerating adaptive immunity. As a result, MuSC function is shifted toward  
443 self-renewal, myofiber formation is hindered, and fibrosis and angiogenesis are delayed (Fig 4I).

444

#### 445 **Aging changes skeletal muscle architecture**

446 Aging is associated with numerous maladaptive changes in skeletal muscle including  
447 chronic inflammation, partial denervation, persistent fibrosis, and diminished regenerative  
448 capacity, which together lead to muscle wasting (Blau et al., 2015; Larsson et al., 2019; Muñoz-  
449 Cánoves et al., 2020). Such aging-associated effects have been probed at the transcriptomic level,  
450 both in bulk and at single cell resolution (Petrany et al., 2020a; Schaum et al., 2020; Tabula  
451 Muris Consortium, 2020), but how aging impacts the spatial organization of cells within muscle  
452 tissue has not been thoroughly explored. To address this, we performed CODEX multiplex  
453 imaging on skeletal muscle isolated from aged mice (25-28 months) and compared it to young  
454 muscle (2 mo) to understand the how the spatial cellular neighborhood composition of aged  
455 muscle changes and how this could lead to diminished regeneration.

456 Our regeneration pseudotime analysis of aged uninjured mouse muscles showed that the  
457 local cellular composition of aged muscles at steady state most closely resembles day 10 of  
458 young muscle regeneration (Fig. 5A,B). This regressed state is widespread throughout aged  
459 muscles and is in stark contrast with the localized degeneration and regeneration triggered by  
460 injury in young (Fig. 5A). We also noted an increase in the variance of regeneration pseudotimes  
461 of cells found in aged muscles, suggesting that aged muscles are more heterogeneous,  
462 concurrently containing cell subtypes normally found at distinct regeneration timepoints in  
463 young (Fig. 5C,D). This aberrant composition is apparent even when aged tissues are compared  
464 to day 10 of regeneration in young. We validated this observation by creating a UMAP

465 projection of tissues representing our regeneration time course. Aged tissues clustered separately  
466 from day 10 regenerating muscles, suggesting that aging alters cell composition compared to  
467 uninjured or day 10 regenerating young muscle (Fig. S7A).

468 Uninjured aged muscles are enriched for cell types consistent with myofiber damage and  
469 repair, not young uninjured muscle (Fig. 5E), although the cell types are less abundant than we  
470 observed following young muscle injury (Fig. S4). CD38<sup>+</sup> ECs and M2 macrophages found in  
471 the stroma of uninjured young muscles were less prevalent in aged muscles ( $p=0.004$  and  $0.02$ ,  
472 respectively). We also observed an increase in the numbers of both injured myofibers ( $p<0.005$ )  
473 and regenerating myofibers ( $p=6\times 10^{-6}$ ). In addition, we detected cell composition changes  
474 associated with early injury and late regeneration simultaneously in aged tissues. FcR<sup>+</sup> and M1  
475 macrophages and FAPs that normally increase in numbers in early regeneration were more  
476 abundant in steady state uninjured aged muscles ( $p=0.015$ ,  $2\times 10^{-6}$  and  $0.02$ , respectively). In  
477 conjunction, MHC-II<sup>+</sup> DCs, macrophage-derived DCs, B cells, smooth muscle cells, Thy1<sup>+</sup>  
478 pericytes, and fibroblasts that normally increase in late regeneration were also more abundant in  
479 aged muscles than in young ( $p=0.005$ ,  $2\times 10^{-5}$ ,  $0.008$ ,  $3\times 10^{-6}$  and  $0.0005$ , respectively). Thus,  
480 aged muscles are characterized by a persistently dysregulated regenerative state.

481 Importantly, several of the observed cell types (Thy1<sup>+</sup> pericytes, macrophage-derived  
482 DCs) were aberrantly localized in the muscle fascia, the connective tissue encapsulating the  
483 muscle, and to small perivascular clusters within the muscle proper (Fig. 5F). The patterns  
484 observed were highly specific; a careful analysis of the perivascular/CD38<sup>low</sup> clusters revealed  
485 that only the perivascular cluster, not the ECs and healthy myofiber cluster, was increased in  
486 aged muscle (Fig. 5H). Overall, consistent with our pseudotime and cell composition analysis,  
487 our neighborhood analysis revealed an increased abundance of clusters of innate and adaptive  
488 immune cell types, de novo myogenesis, motor neuron/fascia, and perivascular/CD38<sup>low</sup> in aged  
489 muscle at steady state that is characteristic of the normal regeneration process seen in young (Fig.  
490 5G, S7B).

491 Together, our data indicate that a combination of increased myofiber turnover, innate and  
492 adaptive inflammation, and vascular and fascia remodeling characterize aged muscles, which  
493 contribute to the loss of tissue homeostasis and alterations in the tissue microenvironment  
494 observed in aging. Moreover, our analysis reveals for the first time the complex

495 microenvironmental changes at the molecular, cellular, and tissue architecture level that occur  
496 with aging.

497

### 498 **Autoimmunity in aged muscle**

499 To probe molecular mechanisms that underlie the changes to the spatial neighborhood  
500 composition of aged muscle, we identified antibodies from our CODEX antibody panel that were  
501 differentially abundant in aged muscles compared to young (Fig 6A). We observed significant  
502 changes in myogenic markers (MyoD and MyoG) in myogenic neighborhoods, as well as  
503 immune markers (CD163, FcR, CD8a, CD11b) in inflammatory neighborhoods (Fig 6A).  
504 However, IgM was the sole factor that was differentially abundant across 6 of the 8 significantly  
505 changed neighborhoods we identified in aged muscle (Fig 6A).

506 IgM is the highest molecular weight immunoglobulin and is one of the first to appear  
507 upon antigen stimulation or microorganism exposure. Our data show that during regeneration  
508 IgM accumulates transiently in young injured myofibers, in conjunction with the influx of  
509 immune cells. Thus, we hypothesized that a persistent accumulation of IgM is a indication of  
510 autoimmunity in aged mice and could facilitate the aberrant proinflammatory changes we note in  
511 aged muscle.

512 Unique to aged muscle, we also observed strong IgM staining in the ECM and  
513 vasculature (Fig. 6B-C, S7C). IgM enriched areas in aged muscle also frequently harbored an  
514 abundance of immune cells that expressed FcR and MHC-II (Fig. 6C, S7C), which suggests that  
515 IgM promotes inflammation. We validated this finding across a range of muscle groups  
516 including diaphragm, tibialis anterior, gastrocnemius, and extensor digitorum longus muscles by  
517 traditional immunofluorescence using fluorophore-conjugated antibodies to mouse IgM  
518 (diaphragm data shown in Fig. 6D). To further understand the aging-associated changes in tissue  
519 IgM levels, we analyzed recently published proteomic mass spectrometry data of young and aged  
520 muscles (Schüler et al., 2021). We found that the mu chain of IgM is consistently detected as  
521 one of the top age-related proteomic changes, increasing over 8-fold in gastrocnemius muscles of  
522 aged mice (Fig. 6E). Overall, these data identify IgM as a systemic factor that accumulates in  
523 aged muscle.

524 It has previously been shown that IgM antibodies made in response to specific antigens  
525 can cross react with self-proteins including host IgG and act as rheumatoid factors (Dresser,

526 1978). Given the IgM accumulation we observed in the ECM of aged skeletal muscles, we  
527 hypothesize that this IgM could target self-proteins, contributing to the decline in muscle  
528 function characteristic of aging. To test this, we compared the autoreactivity of IgM isolated  
529 from the sera of young and aged mice to characterize its potential as a rheumatoid factor. Sera  
530 from aged mice showed a ~2-fold increase in IgM rheumatoid factor compared to young as  
531 analyzed by ELISA (Fig. 6F), consistent with increased autoantibodies and autoimmunity in  
532 aged mice.

533 Age-related partial denervation, signified by axonal blebbing at the neuromuscular  
534 junction (NMJ) followed by the partial loss of innervation, is a major contributor to muscle  
535 wasting. However, the pathobiology of motor neuron damage and cause of this denervation is  
536 unknown. We found that IgM accumulates in the motor neuron and fascia neighborhood of aged  
537 muscle (Fig. 6A). We therefore sought to determine whether IgM accumulation impacts age-  
538 related denervation. To test this, we performed immunostaining on whole mount EDL muscle  
539 isolated from young and aged mice, labeling acetylcholine receptors with bungarotoxin (BTX),  
540 the motor neuron with neurofilament, and IgM to assess whether IgM accumulates at the NMJ of  
541 aged muscle. We observed that while IgM staining is at background levels in young muscles, it is  
542 highly abundant in aged muscles (Fig. 6G-H). Indeed, our assay revealed a ~4-fold increase in  
543 the mean fluorescence intensity of IgM at the NMJs of aged mice relative to young (Fig. 6H). To  
544 establish whether the IgM accumulation in aged muscles could affect motor neuron health, we  
545 stratified aged NMJs by the morphology of pre-synaptic neurofilaments at sites of axonal  
546 blebbing, which is indicative of axonal degeneration. Axonal blebbing at aged NMJs correlated  
547 with higher IgM signal. Since IgM can trigger the classical complement cascade (Chan et al.,  
548 2004; Daha et al., 2011; Sharp et al., 2019), we hypothesize that IgM accumulation underlies  
549 axonal degeneration in aged muscle. Together, our findings reveal an autoimmune origin for the  
550 pro-inflammatory changes commonly observed in aged muscle, likely mediated via IgM.

551

## 552 **Discussion**

553 We present a spatial proteomic atlas of skeletal muscle regeneration at single cell  
554 resolution obtained using CODEX multiplex imaging and unbiased computational approaches  
555 (Fig. 1-2). Using a carefully curated panel of 32 antibodies, we reveal the spatial and temporal  
556 dynamics of 34 cell types during efficacious and dysregulated repair. By combining CODEX and

557 new analytic tools, we show the power of this approach in resolving the spatial and temporal  
558 multicellular interactions in cellular neighborhoods that accompanies efficacious repair of  
559 muscle tissue damage and goes awry in muscle aging. Using neural network and unsupervised  
560 clustering, we are able to perform spatial pseudotime mapping of regeneration, creating a  
561 “regeneration clock” of cellular neighborhood interactions and how they change over time.  
562 These tools which enable an unbiased metric of the repair process, provide an integrated view of  
563 skeletal muscle tissue architecture at single cell resolution. Additionally, they serve as a resource  
564 for understanding complex changes in cellular neighborhoods in other tissues over time and  
565 during regeneration. Such information is lacking in widely used single cell approaches that entail  
566 tissue dissociation or non-multiplexed histological analysis. As such our atlas will serve as a  
567 reference for muscle biologists and a platform for discerning the biology underlying  
568 neuromuscular disease or regeneration in other tissues, and allow a holistic perspective of tissues  
569 that will inform therapeutic interventions.

570 Our atlas provides a spatial context for the heterogeneous cell populations that  
571 characterize muscle tissue, information that is lost upon dissociation of the tissue into single  
572 cells and nuclei for transcriptomic and proteomic studies (De Micheli et al., 2020a; Dos Santos et  
573 al., 2020; Giordani et al., 2019; Petrany et al., 2020a; Porpiglia et al., 2017). Knowledge of  
574 spatial relationships is critical to defining and characterizing specific cell-cell interactions in  
575 cellular neighborhoods. This is underscored by our ability to characterize localized biological  
576 regenerative processes, such as the clearance of ECM scaffolds and regeneration of muscle fibers  
577 (Fig. 3), the arrangement of cell types in dynamically changing cellular neighborhoods, and  
578 resolution of a temporal program of cell-cell interactions (Fig. 4D-E). By resolving the spatial  
579 temporal participation of cell types and functional subsets of cells, for the first time we can  
580 quantify localized regenerative activity (Fig. 4A-C) and identify tissue areas that deviate from  
581 the normal regeneration program (Fig. 4F-I). Our CODEX analysis of 34 cell types and  
582 characterization of 40 markers simultaneously in conjunction with the analytic tools we  
583 developed for analyzing this massive dataset enabled a previously unrecognized appreciation of  
584 the process of regeneration following muscle damage. Our data reveal the cellular mechanisms  
585 underlying impaired healing in the absence of macrophages in young (Arnold et al., 2007;  
586 Chazaud et al., 2003; Du et al., 2017; Ratnayake et al., 2021; Shang et al., 2020; Tidball and  
587 Welc, 2015; Tonkin et al., 2015). The impaired phagocytosis and accumulation of cellular debris

588 that occurs after macrophage depletion fosters the dysregulated behavior that occurs across cell  
589 lineages (Fig. 3-5). We also pinpoint IgM accumulation as a novel feature of aging-associated  
590 chronic muscle inflammation that appears to be most prevalent at sites of denervation (Fig. 6).

591 By understanding and classifying the proximal enrichment of cell types during  
592 regeneration, our atlas reveals a specific temporal regenerative sequence of cell-cell interactions  
593 driven by directed signaling (i.e., signals from a source cell to a responder cell). Upon injury,  
594 injured myofibers recruit neutrophils, M1 macrophages, and FAPs and trigger endothelial  
595 expansion (Fig. 3B-C). The subsequent release of intracellular proteins, mitochondria, double  
596 stranded DNA and ATP create a damage associated molecular pattern (DAMP) recognized by  
597 innate immune cells and mesenchymal stem cells like FAPs (Vénéreau et al., 2015).  
598 Simultaneously, injured myofiber protein remnants acquire immunoglobulins (IgGs and IgMs)  
599 over time (Fig. 2B) and activate macrophages via FcR (Clynes et al., 1998; Deo et al., 1997).  
600 Neutrophils and macrophages release inflammatory lipid metabolites including prostaglandin E2  
601 (PGE2) (Giannakis et al., 2019; Ho et al., 2017) and secrete cytokines (Arnold et al., 2007;  
602 Chazaud et al., 2003; Du et al., 2017; Ratnayake et al., 2021; Shang et al., 2020; Tidball and  
603 Welc, 2015; Tonkin et al., 2015) that activate MuSCs and promote their differentiation to  
604 proliferative myoblasts. Although cytokine signaling is necessary for MuSC expansion, the  
605 primary role of macrophages is to act as phagocytes that remove myofiber debris. Using  
606 clodronate liposomes to effect macrophage depletion, we find that IgM+ debris persists in  
607 injured myofibers, hindering the formation and maturation of new myofibers. Thus, our results  
608 demonstrate that phagocytosis is critical for clearing ECM scaffolds (Fig. 3E-H), a process  
609 required for their use as migratory tracts for myogenic progenitors to regenerate myofibers  
610 efficaciously (Webster et al., 2016).

611 Importantly, our data reveal for the first time that regeneration is not a series of  
612 checkpoints or extrinsic feedback driven process. Specifically, while the checkpoint and  
613 feedback models predict that disruption of regeneration would lead to a stall across cell types, we  
614 reveal that upon macrophage depletion, myogenic cells proceed through programmed  
615 differentiation and immune cell types mount an adaptive response (Fig. 4F-I). The lack of a stall  
616 leads to a co-existence of cell types that do not normally interact during regeneration.  
617 Macrophage depletion triggers the loss of coherent temporally and spatially coordinated cellular  
618 regenerative processes. Moreover, in aging we observe dysregulated changes to muscle structure

619 and function that share features with young muscle that is in a persistent state of regeneration.  
620 Aged muscles exhibit greater myofiber turnover (Fig. 6A and 6H-I). They also feature an  
621 increased abundance of innate and adaptive immune cells, and altered ECM structures (Fig.  
622 S8A-B) consistent with an asynchronously regenerating tissue state (Fig. 6E-F). These changes  
623 are likely driven by combinations of systemic factors and local changes such as denervation,  
624 altered vascularization, and aberrant deposition of IgM.

625 Autoimmunity is common to a range of human neuromuscular disorders. For example,  
626 low muscle mass and sarcopenia develop in a significant proportion of rheumatoid arthritis  
627 patients, where IgM rheumatoid factor is a common diagnostic marker (Torii et al., 2019).  
628 Sjögren's syndrome, which can occur with rheumatoid arthritis, can also present with myositis  
629 with IgM expressing plasma cells infiltrating the muscle (Ringel et al., 1982). We found that IgM  
630 in the sera of aged mice exhibits rheumatoid factor activity (Fig. 6F), indicative of auto-reactivity.  
631 In our aged muscle data, the presence of IgM correlates with immune cell presence (Fig. 6C) and  
632 a chronic pro-inflammatory state. Additionally, the presence of IgM at the NMJ correlates with  
633 aberrant axonal blebbing (Fig. 6F,G) which could result from complement-mediated damage to  
634 the pre-synaptic cell membrane. Complement-mediated damage to neurons and muscle could  
635 cause to Ca<sup>2+</sup> influx and negatively impact mitochondrial functions in the aged, which is a key  
636 therapeutic target for restoring neuromuscular function in the aged (Austin and St-Pierre, 2012;  
637 Palla et al., 2021). Taken together, our findings suggest that distal changes in the aged immune  
638 system could lead to age-related neuromuscular symptoms such as partial denervation and  
639 immune infiltration.

640 Taken together, our single cell resolution spatial atlas of skeletal muscle regeneration  
641 resolves temporally localized cell-cell dynamics. Combining CODEX multiplex imaging and  
642 neural network-powered computational approaches, we demonstrate that spatial analysis can  
643 reveal insights into dynamic processes involving multiple cell types and the tissue ECM in a  
644 manner previously not possible using approaches that dissociate tissues. These approaches pave  
645 the way for a better understanding of disease mechanisms, will improve diagnosis accuracy, and  
646 help validate drug effects across multiple cell types.

647

648 **Limitations of the study**

649 In the current study, fluorescence intensity signals should not be interpreted as absolute  
650 quantification of protein expression. While most antibodies were validated to reflect their  
651 expected target, unexpected cross reactivity of a few antibodies was observed (e.g. anti-TNMD  
652 antibody showed high correlation with CD163 staining on M2 macrophages). This cross  
653 reactivity did not affect clustering or cell type designation, since our approach uses the  
654 expression of all markers, thus we were able to delineate M2 macrophages as CD163+ TNMD+  
655 and tenocytes as CD163– TNMD+ (Fig. S4). Imaging artifacts and tissue folds were minimal but  
656 could affect the accuracy of quantification and cell type designation in the affected regions. Of  
657 note, signal for secreted proteins such as IgM, laminin, ERTR7 can localize to cells that do not  
658 express these proteins, which can explain discrepancies with transcriptome profiles of these cells.  
659 Although cell type annotations were manually validated with corresponding cell types in the  
660 tissue, algorithmic cell type identification is not perfect and remains an area of research and  
661 improvement.

662

## 663 **Methods**

### 664 **Contact for reagent and resource sharing**

665 Further information and requests for reagents and resources should be directed to and will be  
666 fulfilled by the lead contact, Helen M. Blau ([hblau@stanford.edu](mailto:hblau@stanford.edu)).

667

### 668 **Data and code availability**

669 Spatial atlas of muscle cells and CODEX images have been deposited on Zenodo and are  
670 publicly available as of the date of publication. Due to the data size of raw CODEX datasets,  
671 down sampled versions of processed CODEX images are available as  
672 doi:10.5281/zenodo.6609234. Unprocessed or full resolution images are available from the lead  
673 contact upon request. Codes used for data analysis has been deposited at [github.com/will-yx/](https://github.com/will-yx/).  
674 Any additional information required to reanalyze the data reported in this paper is available from  
675 the lead contact upon request.

676

### 677 **Experimental model and subject details**



678 We performed all experiments and protocols in compliance with the institutional guidelines of  
679 Stanford University and Administrative Panel on Laboratory Animal Care (APLAC). Aged (24-  
680 28 mo.) mice C57BL/6 were obtained from the US National Institute on Aging (NIA) aged  
681 colony, and young (2-4 mo.) wild-type C57BL/6 mice from Jackson Laboratory.

682

## 683 **Experimental method details**

### 684 **Muscle injury and clodronate liposome injection**

685 Muscle injuries were induced with a single intramuscular injection of 20  $\mu$ L of notexin (5  $\mu$ g/mL;  
686 Latoxan, catalog no. L8104) into the Tibialis anterior (TA) muscle. Injections were performed  
687 through the skin by inserting a 0.3 mL insulin syringe (BD; cat. 324702) from the distal point of  
688 the tibialis anterior (TA) muscle toward the knee, roughly parallel to the alignment of the  
689 myofibers. For macrophage depletion, 2 days after notexin injection, 40  $\mu$ L of clodronate  
690 liposomes (Clophosome, FormuMax; cat. F70101C-N) or control liposomes (FormuMax; cat.  
691 F70101-N) was injected intramuscularly into the TA. Contralateral legs without injury or  
692 liposome injections were used as uninjured controls.

693

### 694 **Construction of fresh frozen tissue section arrays**

695 Muscle samples were dissected, embedded in a 15 x 15 mm tissue cassette filled with Tissue-Tek  
696 Optimal Cutting Temperature compound (VWR; 25608-930), and frozen in liquid nitrogen-  
697 cooled semi-frozen isopentane. Fresh frozen tissue samples were stored at -80  $^{\circ}$ C until  
698 processing. Tissue blocks were cryo-sectioned in a Leica CM3050S cryostat at 10 $\mu$ m thickness.  
699 Tissue sections were placed on square glass coverslips, 22 mm x 22 mm (Electron Microscopy  
700 Sciences; cat. 63757-10) pre-coated with poly-L-lysine (0.01% in ddH<sub>2</sub>O from 0.1% stock  
701 solution) mixture (Sigma; P8920). Single sections of a series of tissues of uninjured, day 1, 3, 6,  
702 and 10 post-injuries were arranged on each coverslip to form a tissue array. Each coverslip  
703 allowed for 4-6 tissues to fit, and they were stored at -20  $^{\circ}$ C until stained.

704

### 705 **Traditional Immunofluorescence and antibody screening**

706 Tissues were fixed with 4% PFA, blocked with blocking buffer (5% goat serum, 0.5% BSA, 0.5%  
707 Triton-X100 for 45 min in room temperature; if candidate antibody is a mouse IgG, 1% goat  
708 anti-mouse IgG Fab fragment (Jackson Research) was added. After blocking, tissues were  
709 washed with PBS (x3) and stained with candidate primary antibody for 2 hours at room  
710 temperature or overnight at 4 °C, washed with PBS and stained with appropriate secondary  
711 antibody for 2 hours in room temperature. DAPI and TrueBlack stain were added, and then the  
712 slides were mounted and inspected under the microscope. This was done to determine whether  
713 the antibody stained the relevant target and to decide on the dilution ratio for the CODEX  
714 staining. Prior to adding the antibodies to the CODEX antibody panel, all antibodies were tested  
715 on mouse skeletal muscle sections for their staining efficiency following an IHC staining  
716 protocol, as follows.

717

#### 718 **CODEX Buffers and solutions**

719 Buffers and solutions were prepared as described in Schürch et al. 2020. All buffers were filtered  
720 sterile using 500 mL 0.2 µm pore size filters and stored at room temperature unless otherwise  
721 specified.

722 Hydration Buffer (S1), Staining Buffer (S2), and Storage Buffer (S4); (Akoya Biosciences).

723 TE buffer: 10 mM Tris pH 8.0, 1 mM EDTA in ddH<sub>2</sub>O (Invitrogen).

724 CODEX buffer (H2): 150 mM NaCl, 10 mM Tris pH 7.5 (Teknova), 10 mM MgCl<sub>2</sub> · 6 H<sub>2</sub>O  
725 (Sigma), 0.1% w/v Triton X-100 (Sigma) and 0.02% w/v NaN<sub>3</sub> in ddH<sub>2</sub>O; stored as a 10x stock  
726 solution.

727 Blocking component 1 (B1): 1 mg/ml mouse IgG (Sigma) in S2.

728 Blocking component 2 (B2): 1 mg/ml rat IgG (Sigma) in S2.

729 Blocking component 3 (B3): Sheared salmon sperm DNA, 10 mg/ml in H<sub>2</sub>O (Thermo Fisher).

730 Blocking component 4 (B4): Mixture of non-modified CODEX oligonucleotides at a final  
731 concentration of 0.5 mM in TE buffer (IDT).

732 CODEX plate buffer: 33.3 nM Hoechst 33342 (Thermo Fisher) and 0.5 mg/mL B3 in 1x  
733 CODEX buffer.

734 F fixative solution (BS3): 200 mg/ml BS3 (bis(sulfosuccinimidyl)suberate; Thermo Fisher) in  
735 anhydrous DMSO (Sigma); stored at -20°C in 15 µL aliquots; used freshly thawed.

736 CODEX antibody stabilizer solution: Antibody Stabilizer in PBS (Candor Bioscience) with 5mM  
737 EDTA and 0.01% sodium azide (Sigma).

738

### 739 **Generation of CODEX DNA-conjugated antibodies**

740 Antibody conjugations were performed, and oligonucleotide barcode sequences were as  
741 described in Schürch et al. 2020. Oligonucleotide barcodes were conjugated to antibodies via  
742 maleimide-thiol reactions.

743 Protected 5' maleimide-modified oligonucleotides were purchased from Trilink or GeneLink and  
744 were deprotected according to manufacturer's protocol. In brief, lyophilized oligonucleotides  
745 were washed in anhydrous acetonitrile, then heated to >90 °C in anhydrous toluene for 4h (with  
746 an exchange with fresh toluene after 2h). Deprotected oligonucleotides were washed in  
747 anhydrous ethanol three times, resuspended in Buffer C (150 mM NaCl, 2 mM Tris (from a 50  
748 mM stock solution, pH 7.2), 1 mM EDTA and 0.02% w/v NaN<sub>3</sub> in ddH<sub>2</sub>O), aliquoted to PCR  
749 strip tubes (100 µg per aliquot), then snap frozen by liquid nitrogen and lyophilized overnight on  
750 a FreeZone 4.5 Plus lyophilizer (Labconco). Lyophilized deprotected oligonucleotides were  
751 stored at -20°C until antibody conjugation.

752 50 or 100 µg of a validated antibody was placed in an Amicon Ultra 0.5 mL 50 kDa molecular  
753 weight cutoff (MWCO) spin column (EMD Millipore; cat. UFC505096) and concentrated by  
754 centrifugation at 12000 g for 8 min. Antibodies with BSA or glycerol contaminants were first  
755 concentrated in a 100 kDa MWCO spin column (EMD Millipore; cat. UFC510096) and washed  
756 twice with 400 µL of PBS before being transferred to the 50 kDa column. MWCO filters were  
757 first conditioned with 500 µL of PBS-tween and spun down at 12000 g for 2 min. All  
758 centrifugation steps were at 12,000 x g for 8 min and flow-through was discarded, unless  
759 otherwise specified. To reduce disulfide bonds to free thiols, a mixture of 12.5 mM TCEP and  
760 2.5 mM EDTA in 1X PBS was added to the concentrated antibody on the spin column and  
761 incubated for exactly 30 min. Columns were centrifuged to remove the TCEP and washed with  
762 buffer C (150 mM NaCl, 2 mM Tris stock solution, pH 7.2, 1 mM EDTA and 0.02% w/v NaN<sub>3</sub>

763 in ddH<sub>2</sub>O). Per 50 µg of starting antibody, 100 µg of lyophilized deprotected maleimide  
764 oligonucleotides was reconstituted in 15 µl UltraPure Distilled Water (Invitrogen) and then  
765 mixed with 330 µL Buffer C and 50 µL 5M NaCl. The oligonucleotide mixture was added to the  
766 reduced antibody and incubated at room temperature for 2 h. The conjugated antibody was spun  
767 down and washed three times with 450 µl High salt PBS (PBS with 1M NaCl). Per 50 µg of  
768 starting antibody, an amount of 100 µl of CODEX antibody stabilizer solution was added to the  
769 column, mixed by pipetting, then inverted into new collection tubes and centrifuged at 4,000 x g  
770 for 2 min. Conjugated antibodies were stored at 4 °C. Antibody-oligonucleotide barcode  
771 combinations are listed in Table S1.

772

### 773 **Tissue processing and staining for CODEX**

774 Antibody staining was performed in two staining steps. Antibody Mix 1 (AM1) was prepared by  
775 pipetting Myod1, MyoG, DMD, eMyHC, p-H3, Itga7, Pax7, PDGF-alpha, Laminin a2, MyHC  
776 antibodies at indicated dilutions in Table S1 in S1 buffer and mixed with blocking reagents (B1,  
777 B2, B3, B4) in a ratio of 210:10:10:10:10. Antibody Mix 2 (AM2) was prepared by mixing B220,  
778 CD11b, CD3, CD4, CD8a, ERTR7, CD29, CD11c, CD16/32, IgM, MHCII, Ter119, CD38,  
779 GFAP, F4/80, Ki67, Ly6G, Sca1, CD45, CD90, CD47, CD31, CD163, CD9 antibodies at  
780 indicated dilutions in S2 buffer and blocking reagents.

781 Tissue section arrays were thawed for 2 min and washed twice with Hydration Buffer (S1).  
782 Sections were fixed with 1.6% PFA in S1 for 10 min, then washed with S1. 150µL of AM1 was  
783 added to each coverslip and incubated in a hydration chamber at 4 °C overnight. Coverslips were  
784 washed with S1 and then S2 buffer. 150 µL of AM2 was added to each coverslip and incubated  
785 in a hydration chamber at room temperature for 3 h. Coverslips were then washed twice in S2,  
786 fixed with 1.6% PFA for 10 min, and washed 3 times with PBS. Tissues were then fixed with ice  
787 cold methanol for 5 min, followed by PBS washing. To reduce autofluorescence, 200 µL of  
788 TrueBlack (Biotium) was added to the coverslips for 1 min according to manufacturer's  
789 recommendations. A final fixation step was performed F Fixative for 20 min followed with PBS  
790 washing. Coverslips were stored at 4 °C in Storage Solution (S4) until imaging.

791

## 792 **CODEX multi-cycle reaction and image acquisition**

793 CODEX multi-cycle reactions were performed on an Akoya Bioscience CODEX instrument,  
794 according to manufacturer's instructions, and imaged on an automated Keyence BX-700  
795 microscope equipped with a Nikon 20x NA 0.75 Plan APO len. Cycle arrangement and reporter  
796 plate setups are described in Table S2. 10  $\mu$ L of each corresponding fluorophore-conjugated  
797 oligonucleotide reporter to antibodies (10  $\mu$ M in TE buffer; IDT) of a given cycle was mixed  
798 with CODEX plate buffer to a total volume of 250  $\mu$ L and arranged in a 96-well round bottom  
799 plate. The first cycle, and second and third last cycles designated as blank cycles to capture  
800 autofluorescence, no reporter oligonucleotides were added. The final cycle, 1  $\mu$ L of DRAQ5 was  
801 added to 249  $\mu$ L of CODEX plate buffer.

802 Fluidics exchange and image acquisition were fully automated through the Akoya Biosciences  
803 CIM software and Keyence Microscope BZ-X Viewer software. Each tissue was imaged in a 5x7  
804 tiled region and with 33 z-slices with an axial resolution of 0.8  $\mu$ m. Imaging regions were  
805 manually selected after initial staining with Hoechst to capture as much of each tissue as possible.  
806 The z-position of the tissue was automatically determined by the autofocus feature on the  
807 Keyence software, on the center tile of each imaging region, every cycle.

808

## 809 **Immunofluorescence of muscle fiber bundles**

810 Extensor digitorum longus (EDL) muscles were dissected and fixed in 4% PFA in PBS for 20  
811 min, then washed with PBS. EDL muscles were manually teased into myofiber bundles under a  
812 dissection microscope avoiding any contact with the endplate band. Muscle bundles were  
813 permeabilized in 0.3% Triton X-100 in PBS (PBS-T) for 30 minutes and nonspecific binding  
814 was blocked using goat serum-based blocking solution (5% goat serum in PBS-T) for 1 hour.  
815 Tissues were incubated with antibodies against neurofilament (2H3, DSHB, mouse IgG1) and  
816 synaptic vesicle (SV2, DSHB, mouse IgG1) in blocking solution at 5  $\mu$ g/ml for minimum of 24  
817 hours at 4C on a rocker. Muscle fiber bundles were washed extensively with PBS-T and stained  
818 in suspension with Alexa Fluor 546 conjugated goat anti-mouse IgM and Alexa Fluor 488  
819 conjugated goat anti-mouse IgG subclass1 antibodies and Alexa Fluor 647 conjugated  
820 bungarotoxin (BTX) in blocking solution. After extensive washing in PBS muscle fiber bundles

821 were mounted onto SuperFrost Plus slides (Fisher, cat. 12-550-15) using Fluoromount G  
822 (Thermo Fisher; cat 00-4958-02). Muscles were imaged on a spinning disc confocal microscope.  
823 Z stacked 3D images were processed by maximum intensity projection. Neuromuscular junctions  
824 (NMJ) were masked by thresholding on BTX staining and intensities for IgM was measured in  
825 ImageJ. NMJ fragmentation, axonal blebbing phenotype were manually scored.

826

### 827 **ELISA for IgM Rheumatoid Factor**

828 Blood from young and aged mice were collected by cardiac puncture in non-heparin tubes,  
829 allowed to clot for 30mins, and spun down at 3000 x g for 10 min. Sera was collected as the  
830 supernatant, snap frozen, and stored at -80°C until analysis. On the day of analysis, sera were  
831 thawed on ice and IgM Rheumatoid Factor Mouse ELISA (BioVendor; cat 634-02689) was  
832 performed according to manufacturer's instructions.

833

### 834 **Quantification and Statistical Analysis**

#### 835 **Computational image processing and in silico autofluorescence clearing**

836 CODEX images from repeated imaging cycles were processed using the CRISP Image Processor  
837 as described in Palla et al., 2021. Hoechst channels from each imaging cycle was used to align  
838 tiles within each tissue region, 3D drift compensation across cycles, and identify slice(s) of best  
839 focus in the Z axis. All registration and alignment steps were performed in Fourier transformed  
840 frequency domain at sub-pixel resolution. Each image stack was then deconvolved using  
841 Richardson-Lucy algorithm over 50 iterations with a computed vector point spread function (PSF)  
842 estimated using a Gibson-Lanni model with de-ringing filters. Gibson-Lanni parameters were  
843 estimated based on the imaging conditions (xy-resolution of 0.37744  $\mu\text{m}$  per pixel, z-resolution  
844 of 0.8  $\mu\text{m}$  per slice, working distance (ti0) of 1000  $\mu\text{m}$ , relative position of the tissue (zpos) of 10  
845  $\mu\text{m}$ , coverslip thickness (tg) of 170  $\mu\text{m}$ , glass refractive index (ng) of 1.500, immersion  
846 refractive index (ni) of air 1.0003, and sample refractive index (ns) of CODEX buffer containing  
847 20% DMSO  $\sim 1.397$ ). PSFs were generated with 1000 Bessel functions (nbasis) and 1000  
848 computed angles (nrho). Independent PSFs were generated for each channel according to the  
849 emission wavelengths of the fluorophore and their full-width half-max emission as follow:

850 Hoechst,  $455 \pm 70$  nm; FITC,  $517 \pm 40$  nm; ATTO550 or Cy3,  $580 \pm 30$  nm; Alexa647,  $675 \pm 25$   
851 nm. During deconvolution, images were translated in Z axis in the frequency domain to fit the  
852 best focus slice for the entire tissue to a single plane. Concurrently, images were corrected for  
853 lens and microscope sensor artifacts using pre-generated flatfield and darkfield images,  
854 respectively. After deconvolution, images were re-registered in the X-Y axes, then registered  
855 across all channels and stitched into full resolution mosaics. After stitching, blank cycles imaged  
856 at the beginning and end cycles were used to subtract autofluorescence for each channel of each  
857 cycle. Linear interpolation of imaging time and exposure time was used estimate the  
858 autofluorescence contribution of signal and this signal was subtracted from each channel at  
859 single pixel resolution.

860

### 861 **Neural network identification of nuclei and tissue features**

862 Nuclei were segmented using a modified version of CellSeg as described in Lee et al., 2021. The  
863 segmentation portion of CellSeg was run using pre-trained models on the full resolution CRISP  
864 stitched image of the DRAQ5 channel with the following parameters: overlap of 80, min\_area of  
865 40, increase\_factor of 3, autoboot\_percentile of 99.98.

866

867 Tissue features were classified from select channels of the CODEX dataset using FiberNet.  
868 FiberNet is a neural network classifier that performs semantic segmentation on multi-channel  
869 images of stained tissue sections. FiberNet was trained to identify healthy, regenerating, injured,  
870 and ghost muscle fibers along with stroma, motor neurons, and background areas of tissues.

871 The FiberNet model architecture is based on a residual neural network (ResNet) with  
872 modifications to improve rotational invariance. The network determines an object class for each  
873 pixel in the 32-channel input image, along with a confidence score for each of the eight possible  
874 classes. For each image position an input window samples the source image stack at 1 and 1/4  
875 scale, which gives the model access to local detail as well as broad context of the surrounding  
876 area. Input data is fed to two parallel paths within the network, the first of which splits the image  
877 into four quadrants and rotates them to enforce rotational invariance. Because the main branch  
878 only sees a quarter of the input window, a supplemental branch allows the network to consider

879 the entire breadth of the input field of view, albeit at a lower resolution. The primary 'quadrant'  
880 branch employs a series of 2D convolutions with shortcut connections typical of a ResNet  
881 architecture. This branch then bifurcates, processing the data as well as its transpose through a  
882 final 2D convolution layer and two dense layers. The outputs of the four quadrant branches were  
883 stacked, and the mean, minimum, and maximum values were computed across the eight quadrant  
884 results. This again enforces rotational invariance between quadrants. The 'overview' branch  
885 computes a row-wise and column-wise mean of the data and concatenates the left and right and  
886 top and bottom halves of these averages into a single tensor. Once again, only the mean,  
887 minimum, and maximum values of these four sections were taken to enforce rotational  
888 invariance. The network then concatenates the dense output of the two data paths and continues  
889 through a further series of dense layers and the final categorical output layer. The exact  
890 dimensions of the model were parametrized based on the number of convolution layers, method  
891 of padding used, and size of the ResNet output. A typical input window size is 85x85 pixels with  
892 1024 channels at the output of the convolution layers. FiberNet was trained on expert curated  
893 CODEX data on NVIDIA 2080Ti GPUs using Tensorflow (<https://www.tensorflow.org>).  
894 Interpretation was performed on full resolution multi-channel CODEX images to classify each  
895 pixel in the image. Results were manually reviewed and validated by experts to assure accuracy.  
896 A FiberNet Lite model was trained using only the Laminin, DNA, and autofluorescence channel  
897 to allow segmentation of myofibers in traditional immunofluorescence images of skeletal muscle  
898 cross sections. Neural network classified image were post-processed into morphological masks,  
899 refined using morphological erosion and dilation functions from the scikit-image package, and  
900 morphologically assessed for area, centroid, mean intensity, major and minor axis lengths using  
901 the `measure.regionprops_table` functions from the Scikit-Image (Walt et al., 2014) python  
902 package. Mask objects were filtered by area for greater than 1000 and less than 30000 pixels.

903

#### 904 **Quantification of antibody staining intensity**

905 Nuclei masks segmented by CellSeg were used to quantify antibody staining intensity. Nuclei  
906 masks were expanded using morphological growth by 2.5 pixels. The border 2 pixels of the  
907 grown mask were then used to quantify cytoplasmic or membrane staining intensity of each  
908 antibody, and the remaining interior pixels were used to quantify nuclear staining of each



909 antibody. The mean value of pixels in each compartment for each cell was used for downstream  
910 analysis.

911

## 912 **Data preprocessing, unsupervised clustering, and annotation of single cells**

913 Single cell staining intensity data across 11 CODEX experiments (“run”) consisting of 47 tissues  
914 including young uninjured, young regenerating, young regenerating after clodronate treatment,  
915 and aged uninjured samples were concatenated together and analyzed as a single dataset using  
916 HFcluster. Highly autofluorescent cells and falsely segmented cells were removed based on  
917 intensities measured in the blank channels and lack of signal in DNA channels. Staining  
918 intensities for single cells in each run were quantile normalized to 95th percentile and zero  
919 centered at the median or 50<sup>th</sup> percentile. Normalized intensities of select markers (Table S1)  
920 were used for clustering. For HFcluster’s two step clustering approach, an automated elbow-  
921 finding approach is used to estimate a threshold for high confidence positive staining. Cell  
922 intensities were high pass filtered at the threshold value. This step sparsifies the intensity matrix  
923 causing cells with low or poor staining patterns to drop out. The filtered intensity values were  
924 clustered with the Louvain algorithm (as implemented in the single cell analysis python package,  
925 Scanpy (Wolf et al., 2018)), whereby poorly stained cells will cluster together and cells with high  
926 confidence staining can be more accurately clustered. The cluster labels of cells with high  
927 confidence staining were propagated onto poorly stained cells using the pre-filtered normalized  
928 intensity matrix. The propagated clusters were merged via hierarchical clustering using  
929 correlation distances of the mean intensities of each cluster, which resulted in 75 clusters.  
930 Merged clusters were then manually annotated based on expected antibody staining patterns into  
931 33 cell subsets. Each subset was validated against the original CODEX image data for accuracy  
932 of annotation.

933

## 934 **Generation of cell-cell interaction networks and cellular neighborhoods**

935 Cell-cell interaction networks were predicted based on the spatial arrangement of cell types  
936 within tissues. For each cell in the dataset, a niche or window consisting of the index cell and its  
937 10 nearest neighbors were identified using a distance map of cells within its source tissue. The

938 cell type identities of the neighbors were counted to reveal the niche composition of each cell. To  
939 normalize for differences in abundances of each cell type, the niche composition was quantile  
940 normalized and the enrichment of pairwise interactions were shown as mean quantile values for  
941 niches of all cells of a given cell type.

942 Cell neighborhoods were defined by clustering niches according to cell type compositions as  
943 described in Schürch et al. 2020 using modified clustering approaches. In brief, niches for all  
944 cells were clustered using the Leiden algorithm with resolution of 0.5. Scarce neighborhoods  
945 with a total of less than 1000 cells across all tissues were merged into an unassigned cluster. The  
946 abundance of neighborhoods in each tissue across the regeneration time course was used to meta-  
947 cluster neighborhoods into temporal clusters.

948

#### 949 **Tissue cell type composition and enrichment analysis**

950 Cell types and numbers of cells in each cell neighborhood were counted in each tissue,  
951 normalized to the total number of cells in the tissue, which represents the proportion of cells in  
952 the tissue. Log transformed enrichment for any given cell type or cell cluster across time is  
953 calculated as:

$$\log_2(\text{enrichment}) = \log_2\left(\frac{\text{proportion}}{\text{average proportion across all tissues}} + 1\right)$$

954

#### 955 **Spatial pseudotime analysis**

956 Pseudotime encoding for each cell type was calculated as a likelihood of cell type at each  
957 sampled time point. To normalize for the different numbers of cells at given time points, cell  
958 type counts were first normalized to the total number of cells found at a given time point. Then,  
959 the likelihood of a cell type being present in samples of a given time point was calculated as  
960 normalized counts divided by the sum of normalized counts across the entire normal time course  
961 of regeneration. The average pseudotime of a cell type was calculated by multiplying the  
962 likelihood with regeneration time points (days after injury; an estimated value of day 20 was  
963 used for uninjured muscle). For tissue pseudotime, the positional information of each cell in the  
964 tissue is encoded with their average pseudotime according to their cell type. Tissues were then

965 subsampled into  $\sim 75 \times 75 \mu\text{m}$  (200 x 200 pixel) bins, whereby the mean pseudotime of cells  
966 within each bin, difference of the mean pseudotime to actual time, and variance of pseudotimes  
967 of cells within each bin were assessed using Numpy (Harris et al., 2020) and visualized using the  
968 Scikit-Image (Walt et al., 2014) python package. Bins lacking cells, thus resulting in NaN values,  
969 were ignored in the subsequent analysis.

970

### 971 **Dimensional reduction using UMAP and clustering for co-occurring cell types within** 972 **neighborhoods and ECM scaffolds**

973 Dimension reduction for the cell type compositions of tissues and cells within ECM scaffolds  
974 was performed using Uniform Manifold Approximation and Projection (UMAP) (McInnes et al.,  
975 2020). Input data were normalized along dimensions as proportions of total events or as  
976 enrichment across time points. Minimum distance and number of neighbors parameters were  
977 adjusted according to number of data points to maximally resolve heterogeneity. Clustering was  
978 performed on the UMAP embedding using the Leiden algorithms.

979

### 980 **Statistical analysis**

981 Statistical analysis was performed with one-way ANOVA with multiple pairwise comparisons  
982 Tukey HSD tests using the Scipy stats module (<https://scipy.org>) and bioinfokit (Bedre, 2021)  
983 python packages. P values of less than 0.05 were considered statistically significant.

984

985

986 **Acknowledgements**

987 We apologize to those investigators whose important work we were unable to cite or describe  
988 owing to space constraints. We thank Akshay Balsubramani for their critical input and advice on  
989 computational approaches to resolve single cell data. We thank Megan Mayerle for careful  
990 editing and proofreading, Peggy Kraft and Kassie Koleckar for technical support, and Cindy  
991 Paulazzo and Megan Mayerle for administrative support. This study was supported by the Baxter  
992 Foundation, the Li Ka Shing Foundation, Milky Way Research Foundation MWRF-216064,  
993 California Institute for Regenerative Medicine (CIRM) grant DISC2-10604 and US National  
994 Institutes of Health (NIH) grant 5R01AG020961, 1R01AG069858 to H.M.B and  
995 5R01HG009674 to A.K. and H.M.B. and U.S. Food and Drug Administration (FDA) Medical  
996 Countermeasures Initiative contracts 75F40120C00176 and HHSF223201610018C to GPN.  
997 Y.X.W. was supported by the Canadian Institutes of Health Research, Stanford Translational  
998 Research and Applied Medicine (TRAM) Pilot grant, and NIH K99 award K99NS120278, J.G  
999 was supported through the DARE Fellowship Program, a partnership between the Lundbeck  
1000 Foundation and Innovation Centre Denmark, based in Silicon Valley. C.M.S. was supported by  
1001 an Advanced Postdoc Mobility Fellowship from the Swiss National Science Foundation  
1002 (P300PB\_171189, P400PM\_183915). Y.G. was supported by NIH grants U54 CA209971,  
1003 5U01AI101984 and 3U54HG010426 to G.P.N. This article reflects the views of the authors and  
1004 should not be construed as representing the views or policies of the FDA, NIH or other funding  
1005 sources listed here.

1006

1007 **Author Contributions**

1008 Y.X.W. and H.M.B. conceived and designed the study. Y.X.W., J.N.H., C.M.S., and Y.G.  
1009 developed assays and optimized conditions for CODEX. Y.X.W., J.N.H, J.G., carried out muscle  
1010 regeneration studies and performed CODEX imaging. Y.X.W., and C.H. developed CRISP,  
1011 FiberNet, and HFCluster and carried out computational analysis of CODEX data. M.Y.L.,  
1012 C.M.S., Y.G., and G.P.N. developed CellSeg, which was modified by C.H. for this study.  
1013 Y.X.W., M.A., and S.S. performed analysis of aged muscles and performed analyses of  
1014 neuromuscular junctions. Y.X.W., J.G., C.H., and H.M.B. wrote the manuscript with inputs from  
1015 all authors.

## References

- Anton, E.S., Hadjiargyrou, M., Patterson, P.H., and Matthew, W.D. (1995). CD9 plays a role in Schwann cell migration in vitro. *J Neurosci* 15, 584–595. .
- Arnold, L., Henry, A., Poron, F., Baba-Amer, Y., Rooijen, N. van, Plonquet, A., Gherardi, R.K., and Chazaud, B. (2007). Inflammatory monocytes recruited after skeletal muscle injury switch into antiinflammatory macrophages to support myogenesis. *Journal of Experimental Medicine* 204, 1057–1069. <https://doi.org/10.1084/jem.20070075>.
- Austin, S., and St-Pierre, J. (2012). PGC1alpha and mitochondrial metabolism--emerging concepts and relevance in ageing and neurodegenerative disorders. *J Cell Sci* 125, 4963–4971. <https://doi.org/10.1242/jcs.113662>.
- Bedre, R. (2021). *reneshbedre/bioinfokit: Bioinformatics data analysis and visualization toolkit (Zenodo)*.
- Bendall, S.C., Simonds, E.F., Qiu, P., Amir, E.D., Krutzik, P.O., Finck, R., Bruggner, R.V., Melamed, R., Trejo, A., Ornatsky, O.I., et al. (2011). Single-cell mass cytometry of differential immune and drug responses across a human hematopoietic continuum. *Science* 332, 687–696. <https://doi.org/10.1126/science.1198704>.
- Bentzinger, C.F., Wang, Y.X., and Rudnicki, M.A. (2012). Building muscle: molecular regulation of myogenesis. *Cold Spring Harb Perspect Biol* 4. <https://doi.org/10.1101/cshperspect.a008342>.
- Bentzinger, C.F., Wang, Y.X., Dumont, N.A., and Rudnicki, M.A. (2013). Cellular dynamics in the muscle satellite cell niche. *EMBO Rep.* 14, 1062–1072. <https://doi.org/10.1038/embor.2013.182>.
- Blau, H.M., and Daley, G.Q. (2019). Stem Cells in the Treatment of Disease. *New England Journal of Medicine* 380, 1748–1760. <https://doi.org/10.1056/NEJMra1716145>.
- Blau, H.M., Cosgrove, B.D., and Ho, A.T.V. (2015). The central role of muscle stem cells in regenerative failure with aging. *Nat Med* 21, 854–862. <https://doi.org/10.1038/nm.3918>.
- Brigitte, M., Schilte, C., Plonquet, A., Baba-Amer, Y., Henri, A., Charlier, C., Tajbakhsh, S., Albert, M., Gherardi, R.K., and Chrétien, F. (2010). Muscle resident macrophages control the immune cell reaction in a mouse model of notexin-induced myoinjury. *Arthritis Rheum* 62, 268–279. <https://doi.org/10.1002/art.27183>.
- Chan, R.K., Ding, G., Verna, N., Ibrahim, S., Oakes, S., Austen, W.G., Hechtman, H.B., and Moore, F.D. (2004). IgM binding to injured tissue precedes complement activation during skeletal muscle ischemia-reperfusion. *J. Surg. Res.* 122, 29–35. <https://doi.org/10.1016/j.jss.2004.07.005>.
- Chazaud, B., Sonnet, C., Lafuste, P., Bassez, G., Rimaniol, A.-C., Poron, F., Authier, F.-J., Dreyfus, P.A., and Gherardi, R.K. (2003). Satellite cells attract monocytes and use macrophages

as a support to escape apoptosis and enhance muscle growth. *J. Cell Biol.* *163*, 1133–1143. <https://doi.org/10.1083/jcb.200212046>.

Clynes, R., Takechi, Y., Moroi, Y., Houghton, A., and Ravetch, J.V. (1998). Fc receptors are required in passive and active immunity to melanoma. *Proc Natl Acad Sci U S A* *95*, 652–656. <https://doi.org/10.1073/pnas.95.2.652>.

Daha, N.A., Banda, N.K., Roos, A., Beurskens, F.J., Bakker, J.M., Daha, M.R., and Trouw, L.A. (2011). Complement activation by (auto-) antibodies. *Mol Immunol* *48*, 1656–1665. <https://doi.org/10.1016/j.molimm.2011.04.024>.

De Micheli, A.J., Laurilliard, E.J., Heinke, C.L., Ravichandran, H., Fraczek, P., Soueid-Baumgarten, S., De Vlaminck, I., Elemento, O., and Cosgrove, B.D. (2020a). Single-Cell Analysis of the Muscle Stem Cell Hierarchy Identifies Heterotypic Communication Signals Involved in Skeletal Muscle Regeneration. *Cell Reports* *30*, 3583-3595.e5. <https://doi.org/10.1016/j.celrep.2020.02.067>.

De Micheli, A.J., Spector, J.A., Elemento, O., and Cosgrove, B.D. (2020b). A reference single-cell transcriptomic atlas of human skeletal muscle tissue reveals bifurcated muscle stem cell populations. *Skeletal Muscle* *10*, 19. <https://doi.org/10.1186/s13395-020-00236-3>.

Deo, Y.M., Graziano, R.F., Repp, R., and van de Winkel, J.G. (1997). Clinical significance of IgG Fc receptors and Fc gamma R-directed immunotherapies. *Immunol Today* *18*, 127–135. [https://doi.org/10.1016/s0167-5699\(97\)01007-4](https://doi.org/10.1016/s0167-5699(97)01007-4).

Docheva, D., Hunziker, E.B., Fässler, R., and Brandau, O. (2005). Tenomodulin is necessary for tenocyte proliferation and tendon maturation. *Mol Cell Biol* *25*, 699–705. <https://doi.org/10.1128/MCB.25.2.699-705.2005>.

Dos Santos, M., Backer, S., Saintpierre, B., Izac, B., Andrieu, M., Letourneur, F., Relaix, F., Sotiropoulos, A., and Maire, P. (2020). Single-nucleus RNA-seq and FISH identify coordinated transcriptional activity in mammalian myofibers. *Nat Commun* *11*, 5102. <https://doi.org/10.1038/s41467-020-18789-8>.

Dresser, D.W. (1978). Most IgM-producing cells in the mouse secrete auto-antibodies (rheumatoid factor). *Nature* *274*, 480–483. <https://doi.org/10.1038/274480a0>.

Du, H., Shih, C.-H., Wosczyzna, M.N., Mueller, A.A., Cho, J., Aggarwal, A., Rando, T.A., and Feldman, B.J. (2017). Macrophage-released ADAMTS1 promotes muscle stem cell activation. *Nature Communications* *8*, 669. <https://doi.org/10.1038/s41467-017-00522-7>.

Dumont, N.A., Wang, Y.X., and Rudnicki, M.A. (2015). Intrinsic and extrinsic mechanisms regulating satellite cell function. *Development* *142*, 1572–1581. <https://doi.org/10.1242/dev.114223>.

Ferrucci, L., and Fabbri, E. (2018). Inflammageing: chronic inflammation in ageing, cardiovascular disease, and frailty. *Nat Rev Cardiol* *15*, 505–522. <https://doi.org/10.1038/s41569-018-0064-2>.

Fitzner-Attas, C.J., Lowry, M., Crowley, M.T., Finn, A.J., Meng, F., DeFranco, A.L., and Lowell, C.A. (2000). Fcγ Receptor–Mediated Phagocytosis in Macrophages Lacking the Src Family Tyrosine Kinases Hck, Fgr, and Lyn. *Journal of Experimental Medicine* *191*, 669–682. <https://doi.org/10.1084/jem.191.4.669>.

Fuchs, E., and Blau, H.M. (2020). Tissue Stem Cells: Architects of Their Niches. *Cell Stem Cell* *27*, 532–556. <https://doi.org/10.1016/j.stem.2020.09.011>.

Giannakis, N., Sansbury, B.E., Patsalos, A., Hays, T.T., Riley, C.O., Han, X., Spite, M., and Nagy, L. (2019). Dynamic changes to lipid mediators support transitions among macrophage subtypes during muscle regeneration. *Nat Immunol* *20*, 626–636. <https://doi.org/10.1038/s41590-019-0356-7>.

Giordani, L., He, G.J., Negroni, E., Sakai, H., Law, J.Y.C., Siu, M.M., Wan, R., Corneau, A., Tajbakhsh, S., Cheung, T.H., et al. (2019). High-Dimensional Single-Cell Cartography Reveals Novel Skeletal Muscle-Resident Cell Populations. *Molecular Cell* *74*, 609–621.e6. <https://doi.org/10.1016/j.molcel.2019.02.026>.

Goltsev, Y., Samusik, N., Kennedy-Darling, J., Bhate, S., Hale, M., Vazquez, G., Black, S., and Nolan, G.P. (2018). Deep Profiling of Mouse Splenic Architecture with CODEX Multiplexed Imaging. *Cell* *174*, 968–981.e15. <https://doi.org/10.1016/j.cell.2018.07.010>.

Hardy, D., Besnard, A., Latil, M., Jouvion, G., Briand, D., Thépenier, C., Pascal, Q., Guguin, A., Gayraud-Morel, B., Cavallion, J.-M., et al. (2016). Comparative Study of Injury Models for Studying Muscle Regeneration in Mice. *PLoS ONE* *11*, e0147198. <https://doi.org/10.1371/journal.pone.0147198>.

Harris, C.R., Millman, K.J., van der Walt, S.J., Gommers, R., Virtanen, P., Cournapeau, D., Wieser, E., Taylor, J., Berg, S., Smith, N.J., et al. (2020). Array programming with NumPy. *Nature* *585*, 357–362. <https://doi.org/10.1038/s41586-020-2649-2>.

Ho, A.T.V., Palla, A.R., Blake, M.R., Yucel, N.D., Wang, Y.X., Magnusson, K.E.G., Holbrook, C.A., Kraft, P.E., Delp, S.L., and Blau, H.M. (2017). Prostaglandin E2 is essential for efficacious skeletal muscle stem-cell function, augmenting regeneration and strength. *Proc. Natl. Acad. Sci. U.S.A.* *114*, 6675–6684. <https://doi.org/10.1073/pnas.1705420114>.

Hu, J.M., Liu, K., Liu, J.H., Jiang, X.L., Wang, X.L., Chen, Y.Z., Li, S.G., Zou, H., Pang, L.J., Liu, C.X., et al. (2017). CD163 as a marker of M2 macrophage, contribute to predict aggressiveness and prognosis of Kazakh esophageal squamous cell carcinoma. *Oncotarget* *8*, 21526–21538. <https://doi.org/10.18632/oncotarget.15630>.

Joe, A.W.B., Yi, L., Natarajan, A., Le Grand, F., So, L., Wang, J., Rudnicki, M.A., and Rossi, F.M.V. (2010). Muscle injury activates resident fibro/adipogenic progenitors that facilitate myogenesis. *Nat. Cell Biol.* *12*, 153–163. <https://doi.org/10.1038/ncb2015>.

Kennedy-Darling, J., Bhate, S.S., Hickey, J.W., Black, S., Barlow, G.L., Vazquez, G., Venkatarahaman, V.G., Samusik, N., Goltsev, Y., Schürch, C.M., et al. (2021). Highly

multiplexed tissue imaging using repeated oligonucleotide exchange reaction. *Eur J Immunol* 51, 1262–1277. <https://doi.org/10.1002/eji.202048891>.

Larsson, L., Degens, H., Li, M., Salviati, L., Lee, Y.I., Thompson, W., Kirkland, J.L., and Sandri, M. (2019). Sarcopenia: Aging-Related Loss of Muscle Mass and Function. *Physiol Rev* 99, 427–511. <https://doi.org/10.1152/physrev.00061.2017>.

Lee, M.Y., Bedia, J.S., Bhate, S.S., Barlow, G.L., Phillips, D., Fantl, W.J., Nolan, G.P., and Schürch, C.M. (2022). CellSeg: a robust, pre-trained nucleus segmentation and pixel quantification software for highly multiplexed fluorescence images. *BMC Bioinformatics* 23, 46. <https://doi.org/10.1186/s12859-022-04570-9>.

Mann, C.J., Perdiguero, E., Kharraz, Y., Aguilar, S., Pessina, P., Serrano, A.L., and Muñoz-Cánoves, P. (2011). Aberrant repair and fibrosis development in skeletal muscle. *Skelet Muscle* 1, 21. <https://doi.org/10.1186/2044-5040-1-21>.

McInnes, L., Healy, J., and Melville, J. (2020). UMAP: Uniform Manifold Approximation and Projection for Dimension Reduction (arXiv).

Morton, A.B., Norton, C.E., Jacobsen, N.L., Fernando, C.A., Cornelison, D.D.W., and Segal, S.S. (2019). Barium chloride injures myofibers through calcium-induced proteolysis with fragmentation of motor nerves and microvessels. *Skeletal Muscle* 9, 27. <https://doi.org/10.1186/s13395-019-0213-2>.

Muñoz-Cánoves, P., Neves, J., and Sousa-Victor, P. (2020). Understanding muscle regenerative decline with aging: new approaches to bring back youthfulness to aged stem cells. *FEBS J* 287, 406–416. <https://doi.org/10.1111/febs.15182>.

Palla, A.R., Ravichandran, M., Wang, Y.X., Alexandrova, L., Yang, A.V., Kraft, P., Holbrook, C.A., Schürch, C.M., Ho, A.T.V., and Blau, H.M. (2021). Inhibition of prostaglandin-degrading enzyme 15-PGDH rejuvenates aged muscle mass and strength. *Science* 371, eabc8059. <https://doi.org/10.1126/science.abc8059>.

Petrany, M.J., Swoboda, C.O., Sun, C., Chetal, K., Chen, X., Weirauch, M.T., Salomonis, N., and Millay, D.P. (2020a). Single-nucleus RNA-seq identifies transcriptional heterogeneity in multinucleated skeletal myofibers. *Nat Commun* 11, 6374. <https://doi.org/10.1038/s41467-020-20063-w>.

Petrany, M.J., Song, T., Sadayappan, S., and Millay, D.P. (2020b). Myocyte-derived Myomaker expression is required for regenerative fusion but exacerbates membrane instability in dystrophic myofibers. *JCI Insight* 5, 136095. <https://doi.org/10.1172/jci.insight.136095>.

Pollock, N., James, S.L.J., Lee, J.C., and Chakraverty, R. (2014). British athletics muscle injury classification: a new grading system. *Br J Sports Med* 48, 1347–1351. <https://doi.org/10.1136/bjsports-2013-093302>.



Porpiglia, E., Samusik, N., Van Ho, A.T., Cosgrove, B.D., Mai, T., Davis, K.L., Jager, A., Nolan, G.P., Bendall, S.C., Fantl, W.J., et al. (2017). High-resolution myogenic lineage mapping by single-cell mass cytometry. *Nat. Cell Biol.* *19*, 558–567. <https://doi.org/10.1038/ncb3507>.

Ratnayake, D., Nguyen, P.D., Rossello, F.J., Wimmer, V.C., Tan, J.L., Galvis, L.A., Julier, Z., Wood, A.J., Boudier, T., Isiaku, A.I., et al. (2021). Macrophages provide a transient muscle stem cell niche via NAMPT secretion. *Nature* *591*, 281–287. <https://doi.org/10.1038/s41586-021-03199-7>.

Relaix, F., and Zammit, P.S. (2012). Satellite cells are essential for skeletal muscle regeneration: the cell on the edge returns centre stage. *Development* *139*, 2845–2856. <https://doi.org/10.1242/dev.069088>.

Ringel, S.P., Forstot, J.Z., Tan, E.M., Wehling, C., Griggs, R.C., and Butcher, D. (1982). Sjögren's syndrome and polymyositis or dermatomyositis. *Arch Neurol* *39*, 157–163. <https://doi.org/10.1001/archneur.1982.00510150027007>.

Schaum, N., Lehallier, B., Hahn, O., Pálovics, R., Hosseinzadeh, S., Lee, S.E., Sit, R., Lee, D.P., Losada, P.M., Zardeneta, M.E., et al. (2020). Aging hallmarks exhibit organ-specific temporal signatures. *Nature* *583*, 596–602. <https://doi.org/10.1038/s41586-020-2499-y>.

Schüler, S.C., Kirkpatrick, J.M., Schmidt, M., Santinha, D., Koch, P., Di Sanzo, S., Cirri, E., Hemberg, M., Ori, A., and von Maltzahn, J. (2021). Extensive remodeling of the extracellular matrix during aging contributes to age-dependent impairments of muscle stem cell functionality. *Cell Reports* *35*, 109223. <https://doi.org/10.1016/j.celrep.2021.109223>.

Schürch, C.M., Bhate, S.S., Barlow, G.L., Phillips, D.J., Noti, L., Zlobec, I., Chu, P., Black, S., Demeter, J., McIlwain, D.R., et al. (2020). Coordinated Cellular Neighborhoods Orchestrate Antitumoral Immunity at the Colorectal Cancer Invasive Front. *Cell* *182*, 1341-1359.e19. <https://doi.org/10.1016/j.cell.2020.07.005>.

Shang, M., Cappellesso, F., Amorim, R., Serneels, J., Virga, F., Eelen, G., Carobbio, S., Rincon, M.Y., Maechler, P., De Bock, K., et al. (2020). Macrophage-derived glutamine boosts satellite cells and muscle regeneration. *Nature* *587*, 626–631. <https://doi.org/10.1038/s41586-020-2857-9>.

Sharp, T.H., Boyle, A.L., Diebolder, C.A., Kros, A., Koster, A.J., and Gros, P. (2019). Insights into IgM-mediated complement activation based on in situ structures of IgM-C1-C4b. *Proc Natl Acad Sci U S A* *116*, 11900–11905. <https://doi.org/10.1073/pnas.1901841116>.

Silberstein, L., Webster, S.G., Travis, M., and Blau, H.M. (1986). Developmental progression of myosin gene expression in cultured muscle cells. *Cell* *46*, 1075–1081. .

Tabula Muris Consortium (2020). A single-cell transcriptomic atlas characterizes ageing tissues in the mouse. *Nature* *583*, 590–595. <https://doi.org/10.1038/s41586-020-2496-1>.

Tidball, J.G. (2017). Regulation of muscle growth and regeneration by the immune system. *Nat Rev Immunol* *17*, 165–178. <https://doi.org/10.1038/nri.2016.150>.

Tidball, J.G., and Welc, S.S. (2015). Macrophage-Derived IGF-1 Is a Potent Coordinator of Myogenesis and Inflammation in Regenerating Muscle. *Molecular Therapy* 23, 1134–1135. <https://doi.org/10.1038/mt.2015.97>.

Tonkin, J., Temmerman, L., Sampson, R.D., Gallego-Colon, E., Barberi, L., Bilbao, D., Schneider, M.D., Musarò, A., and Rosenthal, N. (2015). Monocyte/Macrophage-derived IGF-1 Orchestrates Murine Skeletal Muscle Regeneration and Modulates Autocrine Polarization. *Molecular Therapy* 23, 1189–1200. <https://doi.org/10.1038/mt.2015.66>.

Torii, M., Hashimoto, M., Hanai, A., Fujii, T., Furu, M., Ito, H., Uozumi, R., Hamaguchi, M., Terao, C., Yamamoto, W., et al. (2019). Prevalence and factors associated with sarcopenia in patients with rheumatoid arthritis. *Mod Rheumatol* 29, 589–595. <https://doi.org/10.1080/14397595.2018.1510565>.

Uezumi, A., Fukada, S., Yamamoto, N., Takeda, S., and Tsuchida, K. (2010). Mesenchymal progenitors distinct from satellite cells contribute to ectopic fat cell formation in skeletal muscle. *Nat. Cell Biol.* 12, 143–152. <https://doi.org/10.1038/ncb2014>.

Vénéreau, E., Ceriotti, C., and Bianchi, M.E. (2015). DAMPs from Cell Death to New Life. *Front Immunol* 6, 422. <https://doi.org/10.3389/fimmu.2015.00422>.

Vracko, R., and Benditt, E.P. (1972). Basal lamina: the scaffold for orderly cell replacement. Observations on regeneration of injured skeletal muscle fibers and capillaries. *J Cell Biol* 55, 406–419. <https://doi.org/10.1083/jcb.55.2.406>.

Walt, S. van der, Schönberger, J.L., Nunez-Iglesias, J., Boulogne, F., Warner, J.D., Yager, N., Guillard, E., and Yu, T. (2014). scikit-image: image processing in Python. *PeerJ* 2, e453. <https://doi.org/10.7717/peerj.453>.

Wang, Y.X., and Rudnicki, M.A. (2012). Satellite cells, the engines of muscle repair. *Nat. Rev. Mol. Cell Biol.* 13, 127–133. <https://doi.org/10.1038/nrm3265>.

Webster, M.T., Manor, U., Lippincott-Schwartz, J., and Fan, C.-M. (2016). Intravital Imaging Reveals Ghost Fibers as Architectural Units Guiding Myogenic Progenitors during Regeneration. *Cell Stem Cell* 18, 243–252. <https://doi.org/10.1016/j.stem.2015.11.005>.

Wolf, F.A., Angerer, P., and Theis, F.J. (2018). SCANPY: large-scale single-cell gene expression data analysis. *Genome Biology* 19, 15. <https://doi.org/10.1186/s13059-017-1382-0>.

Wosczyzna, M.N., Konishi, C.T., Perez Carbajal, E.E., Wang, T.T., Walsh, R.A., Gan, Q., Wagner, M.W., and Rando, T.A. (2019). Mesenchymal Stromal Cells Are Required for Regeneration and Homeostatic Maintenance of Skeletal Muscle. *Cell Rep* 27, 2029-2035.e5. <https://doi.org/10.1016/j.celrep.2019.04.074>.

## **Figure 1. Multiplexed immunofluorescence imaging to elucidate cellular heterogeneity during skeletal muscle regeneration.**

**A)** Schematic of myotoxin-induced murine skeletal muscle injury and regeneration timeline. The tibialis anterior (TA) muscles of young and aged mice were injected intramuscularly with notexin to induce myofiber damage and regeneration.

**B)** Schematic of multiplexed imaging of regenerating skeletal muscle tissues using CODEX. Muscle tissues were cryosectioned onto coverslips, stained with a panel of DNA barcoded antibodies, and rendered by cyclic imaging with fluorophore conjugated cDNA probes using CODEX. Multicycle tissue images were registered, deconvolved, trimmed, and stitched using CRISP image processor.

**C)** Antibody panel design to resolve cell types found during skeletal muscle regeneration. Overlapping and mutually exclusive protein markers were used to distinguish biologically relevant cell types and subsets.

**D)** Representative CODEX images of uninjured and regenerating muscle sections. Pseudo-colored antibody staining as indicated below each image. The same field-of-view is shown across each time point (row). Markers of cell types within each lineage are shown in each column.

## **Figure 2. Single cell spatial atlas of skeletal muscle regeneration.**

**A)** Schematic of computational analysis pipeline to resolve spatial relationships from multiplexed imaging data.

**B)** CODEX images of myofiber states in uninjured muscles and in a time course after injury. Healthy muscle fibers express myosin heavy chains (MyHC, Blue) and dystrophin (DMD, green) on their sarcolemma, and are surrounded by the endomysium marked by ERTR7 (cyan). The myotoxin used induces sarcolemmal damage, resulting in the loss of DMD and leads to the accumulation of IgM (grays) in the injured myofibers. Immune cells marked by CD45 (magenta) infiltrate the muscle at days 1 and 3. Myogenic progenitors differentiate and express embryonic isoforms of myosin Myh3 (eMyHC; red) marking newly formed myotubes. By day 6, eMyHC expression was reduced in regenerating myofibers that mature and begin to re-express DMD. By day 10, the muscle structure are largely restored but the regenerated myofibers showed higher DMD expression. The same field-of-view is shown in each column. A cartoon representation of each stage of myofiber degeneration, regeneration is shown below each respective panel.

**C)** Representative FiberNet classification of skeletal muscle fiber states and stromal regions based on multiplexed imaging data. Images are pseudo-colored by the classification labels of tissue features from FiberNet according to the legend (left)

**D)** Representative cell type annotation of uninjured and regenerating skeletal muscles regions based on multiplexed imaging data. Each dot is one nucleus; Prospectively annotated cell type is represented by the color in the legend (left).

**E)** Temporal enrichment of cell types during skeletal muscle regeneration. Enrichment is min-max normalized for each cell type. Error bands represent s.e.m. n=4-8 per time point.

**F)** UMAP embedding of the cellular composition of uninjured and regenerating skeletal muscles. Arrow indicates the regeneration trajectory from day 1 after injury to the uninjured state.

**G)** Temporal variance of cell types found in muscles at each regeneration time point. Polar coordinates represent the regeneration time course and probability distribution of cells found in each time point across all regeneration time points.

### **Figure 3. Spatial interactions among regenerative cell types of skeletal muscle.**

**A)** Schematic of single cell spatial analysis to identify enrichment pairwise interactions between cell types. Index cells and their nearest neighbors were quantified, and the co-occurrence of cell types in proximity was used to identify enriched interactions.

**B)** Heatmap of pairwise cell-cell interactions during skeletal muscle regeneration. Positive enrichment (red) represents cell type pairs that were found in proximity at rates more than expected; Negative enrichment (blue) represents cell type pairs that were found in proximity at rates less than expected. Hierarchical clustering identified correlations between cell type pairs that represents co-interactions that could be grouped according to biological processes occurring during regeneration (left).

**C)** Cross lineage interactions during skeletal muscle regeneration. Enrichment of pairwise interactions is indicated by arrows. Cell types are arranged by cell lineages as indicated in Fig. 3A. Arrows indicate direction of spatial dynamics; arrow thickness is indicative of enrichment. Red arrows indicate grouped (>0.55 quantile) and blue arrows indicate dispersed dynamics (<0.45 quantile).

**D)** Longitudinal views of extracellular matrix (ECM) scaffolds and infiltrating cell types around injured myofibers at day 3 after myotoxin injury. ECM scaffolds (dashed lines) were marked by ERTR7 (green, top panel); IgM+ injured myofibers (grays), PGDFRa+ FAPs (cyan), CD45+ immune cells (red) and DAPI (blue) shown in the middle panel; CD11b+ myeloid cells (blue), F4/80+ macrophages (yellow), CD11c+ dendritic cells (cyan), and CD163+ M2 macrophages shown in the bottom panel. The same field-of-view is shown across all panels.

**E)** Representative images of regenerating muscles at day 3, 6, and 10 after injury with or without intramuscular injection with clodronate liposomes at day 2. IgM+ injured myofibers (grays, top panels); F4/80+ macrophages (magenta, middle panels); eMyHC+ myotubes and regenerating myofibers (red, bottom panels); ECM scaffolds were marked by ERTR7 (green); DAPI (blue). The same field-of-view is shown in each column.

**F)** Quantification of ECM scaffolds in regenerating muscles at day 3, 6, and 10 after injury with or without intramuscular injection with clodronate liposomes at day 2.

**G)** Quantification of regenerating myofibers in regenerating muscles at day 3, 6, and 10 after injury with or without intramuscular injection with clodronate liposomes at day 2.

**H)** Minimum axis lengths of regenerating myofibers in regenerating muscles at day 3, 6, and 10 after injury with or without intramuscular injection with clodronate liposomes at day 2.

**(F-H)** Error bars represent s.e.m.; n=4-8 per group; \* p<0.05; \*\* p<0.01; \*\*\* p<0.005.

#### **Figure 4. Spatial pseudotime and cell neighborhood analysis of tissue regeneration upon macrophage depletion.**

**A)** Schematics of spatial pseudotime analysis to reveal regeneration dynamics. Positional information of each cell is encoded with a pseudotime. Cells within a tissue can be sampled in a grid to estimate the mean local pseudotime, which can be compared with actual time after regeneration to estimate accelerated or delayed repair. High variance of cell pseudotimes in each grid space indicates the co-occurrence of cells that normally appear at different stages of regeneration, suggesting dysregulation or desynchronization of cellular processes.

**B)** Mean local pseudotime of uninjured and regenerating muscles at day 1, 3, 6, and 10 after injury with or without intramuscular injection with clodronate liposomes at day 2. White dashed lines outline the injured region; red dashed lines outline regions affected by clodronate.

**C)** Difference of local pseudotime to actual time points of uninjured and regenerating muscles at day 1, 3, 6, and 10 after injury with or without intramuscular injection with clodronate liposomes at day 2. Green and purple represent an accelerated or delayed regeneration, respectively; Black dashed lines outline the injured region; red dashed lines outline regions affected by clodronate.

**D)** Spatial temporal cell neighborhood analysis of uninjured and regenerating muscles. Local cell compositions were clustered into spatial neighborhoods, revealing patterns of cellular interactions (left); spatial neighborhoods were further clustered by temporal dynamics during regeneration and after clodronate-treatment (middle heatmap) into temporal clusters. Temporal dynamics of representative spatial neighborhoods are shown for each cluster (right). Error bars represent s.e.m. of relative enrichment in control or clodronate-treated samples; n=4-8 per group.

**E)** Representative temporal neighborhood clusters in uninjured and regenerating muscles at day 1, 3, 6, and 10 after injury with or without intramuscular injection with clodronate liposomes at day 2. Images are pseudo-colored by cell neighborhood clusters from panel **D**.

**F)** Variance of local pseudotime of uninjured and regenerating muscles at day 6 after injury with or without intramuscular injection with clodronate liposomes at day 2. Increased local variance indicates the co-occurrence of cells that normally appear at different stages of regeneration; Black dashed lines outline the injured region; red dashed lines outline regions affected by clodronate.

**G)** Quantification of local pseudotime variance in uninjured and regenerating muscles at day 1, 3, 6, and 10 after injury with or without intramuscular injection with clodronate liposomes at day 2.

Boxes indicate mean, upper and lower quartile range; whiskers are 1.5 times the inter quartile range; n=4-8 per group; \* p<0.05; \*\* p<0.01; \*\*\* p<0.005.

**H)** Heatmap of cellular dysregulation in after macrophage depletion by intramuscular clodronate injection. Log transformed enrichment of cell types in regenerating muscles at day 3, 6, and 10 after injury with or without intramuscular injection with clodronate liposomes at day 2. Each column is a biological replicate; n=4-8 per group; Cell types showing significant change (p<0.05) with clodronate treatment are shown.

**I)** Schematic of cellular dysregulation in after macrophage depletion by intramuscular clodronate injection. Arrow width indicates the relative alteration compared to normal regenerative conditions. X indicates a complete halt or absence of a given cell type.

### **Figure 5. Localized cellular and architectural changes in skeletal muscle associated with murine aging.**

**A)** Mean local pseudotime of uninjured muscles of young and aged mice.

**B)** Quantification of mean local pseudotime of uninjured muscles of young and aged mice. n=8 young and 4 aged samples; \*\* p<0.01.

**C)** Variance of local pseudotime of uninjured muscles of young and aged mice.

**D)** Quantification of local pseudotime variance of uninjured muscles of young and aged mice. n=8 young and 4 aged samples; \*\*\* p<0.005.

**E)** Heatmap of cellular dysregulation in aged muscle. Log transformed enrichment of cell types in uninjured muscles of young and aged mice. Each column is a biological replicate; n=8 young and 4 aged samples; Cell types showing significant change (p<0.05) with aging are shown.

**F)** Representative tissues showing spatial localization of dysregulated cell types in uninjured muscles of young and aged mice. Each dot is one nucleus; Prospectively annotated cell type is represented by the color in the legend (right).

**G)** Heatmap of tissue architectural dysregulation in aged muscle. Log transformed enrichment of temporal neighborhood clusters from **Figure 4D** in uninjured muscles of young and aged mice. Each column is a biological replicate; n=8 young and 4 aged samples; Clusters showing significant change (p<0.05) with aging are shown.

**H)** Expanded analysis of change in spatial neighborhood subclusters in uninjured muscles of young and aged mice. n=8 young and 4 aged samples; \* p<0.05; \*\*\* p<0.005.

### **Figure 6. Age-related extracellular accumulation of IgM in murine skeletal muscle.**

**A)** Network representation of differential mean intensity analysis of CODEX images between uninjured muscles of young and aged mice. Lines represent significant change in staining intensity in the connected temporal neighborhood cluster. The size of circles for each marker indicated the cumulative effect across all connected neighborhoods. n=8 young and 4 aged samples; Markers showing significant change ( $p < 0.05$ ) with aging are shown.

**B)** Representative CODEX images of uninjured muscles of young (left) and aged (right) mice. CD29 (green, top panels) marks myofiber sarcolemma and vasculature; Laminin marks the basal lamina (red, top panels); IgM staining (grays, bottom panels); DAPI (blue). The same field-of-view is shown in each column.

**C)** Representative CODEX images of uninjured muscles of young (left) and aged (right) mice. IgM staining (grays, top panels); Laminin marks the basal lamina (yellow, 2<sup>nd</sup> row panels); Major-histocompatibility class II molecules (MHC-II I-A/I-E, red) and Fc-gamma receptors (CD16/32, cyan) marks immune cells (3<sup>rd</sup> and 4<sup>th</sup> row panels); DAPI (blue). The same field-of-view is shown in each column. Insets show enlarged examples of IgM staining colocalized with immune markers.

**D)** Representative traditional immunofluorescence histology for IgM in uninjured diaphragm muscles young (top) and aged (bottom) mice.

**E)** Protein mass spectrometry quantification of the IgM mu chain in young and aged skeletal muscles, reanalysis of Schüler et al. 2021. Log fold-change over detected levels in muscles of young mice.

**F)** IgM rheumatoid factor ELISA of serum from young and aged mice. n=4 young and 3 aged samples; \*  $p < 0.05$ .

**G)** Representative immunofluorescence of neuromuscular junctions (NMJs) in wholemount uninjured EDL muscles from young (top) and aged (bottom) mice. Bungarotoxin (BTX, grays) marks acetylcholine receptors on the myofibers; neurofilament (NF; green) marks the motor neuron; IgM (red); merged image (right panels). Arrows indicate axonal blebbing observed in aged samples. Insets show enlarged examples of NMJs.

**H)** Quantification of IgM staining intensity at neuromuscular junctions (NMJs) in wholemount uninjured EDL muscles from young and aged mice (left); and aged NMJs stratified by the appearance of axonal blebbing (right). n=3 young and 3 aged samples; Each dot is one NMJ. \*\*\*\*  $p < 0.001$ .

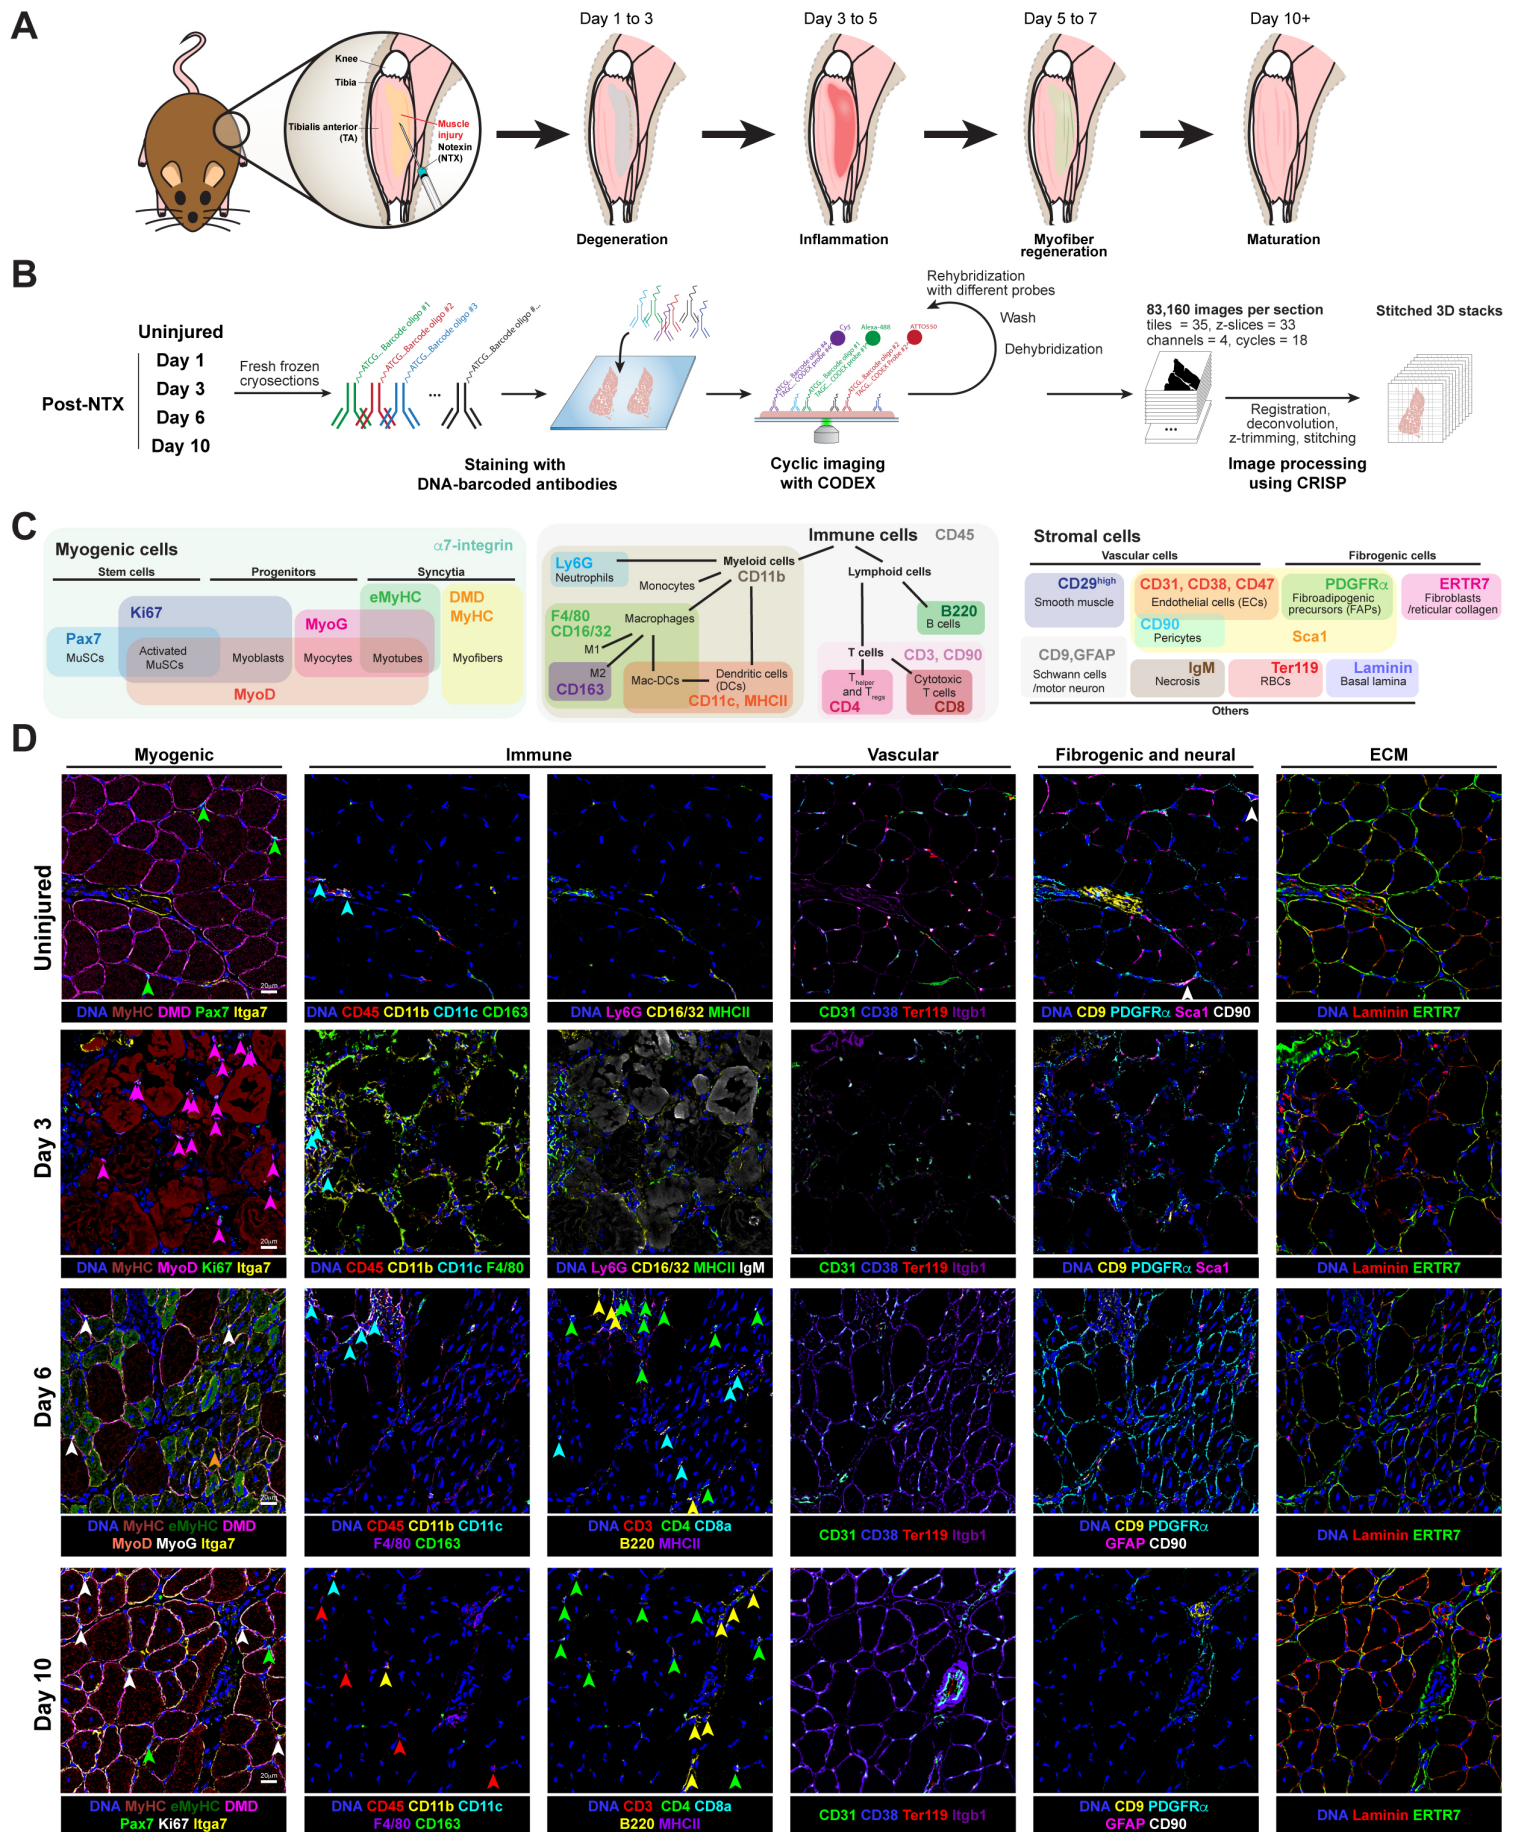



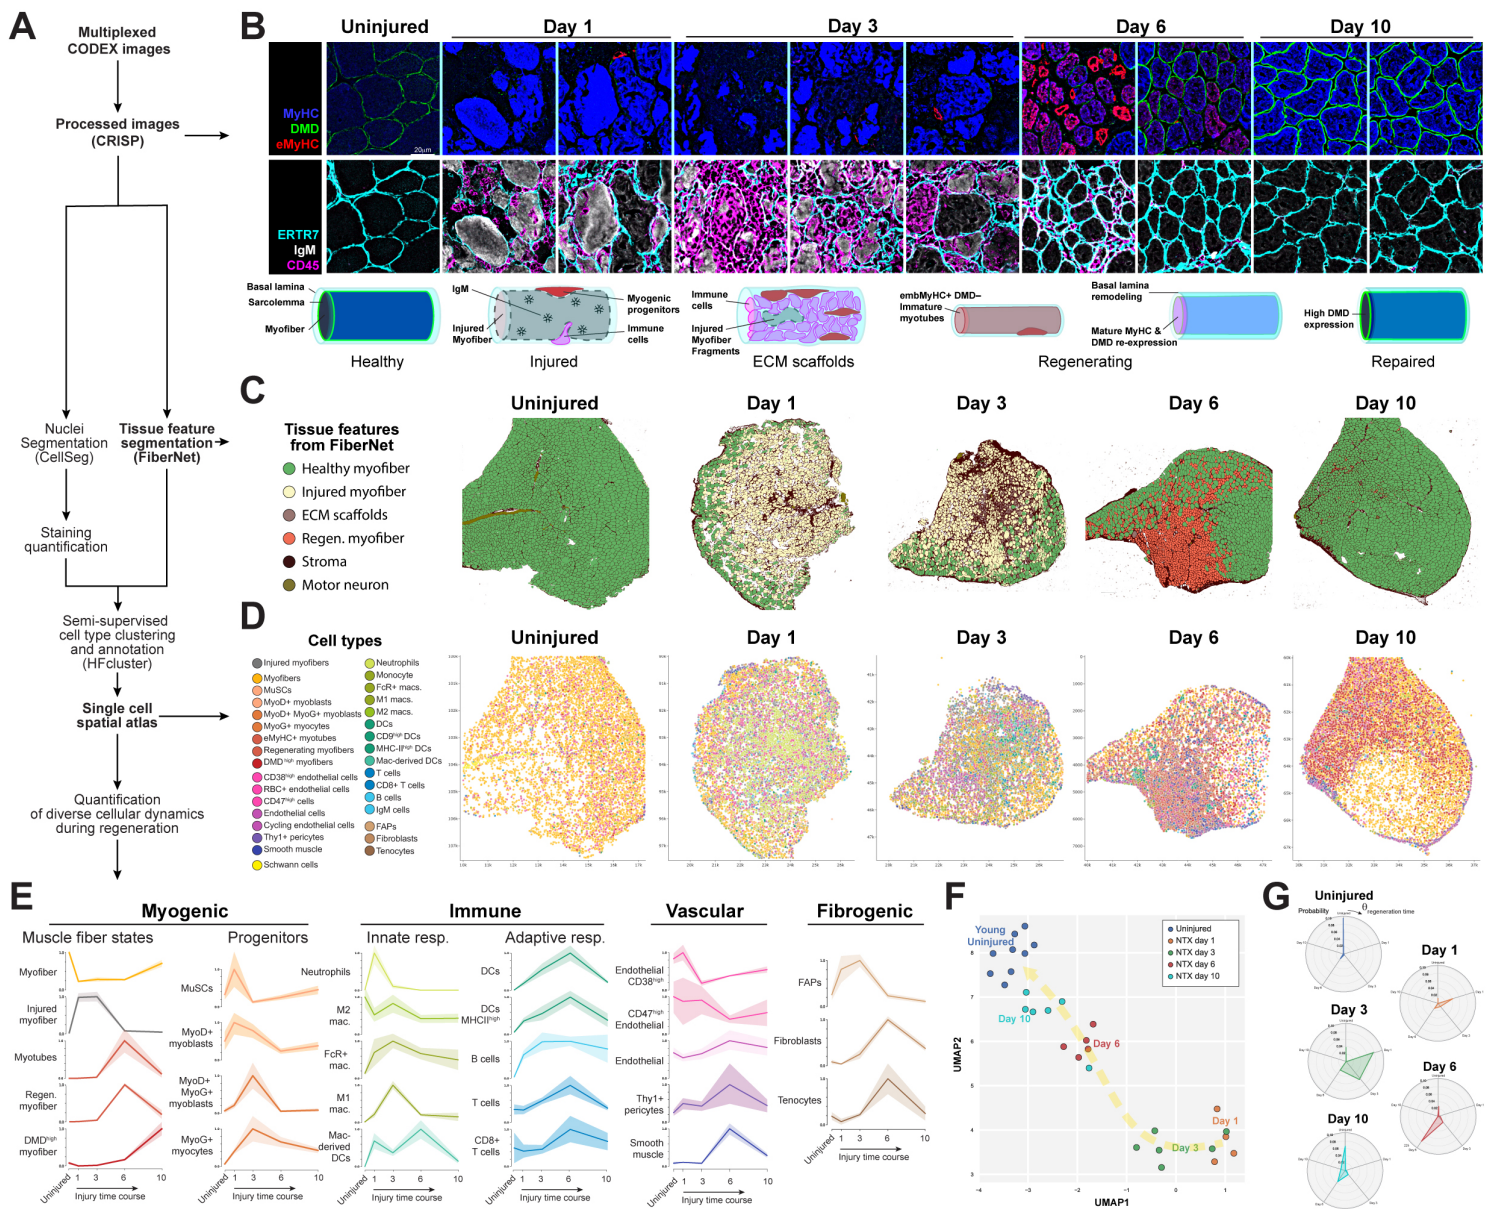

**Figure 2**

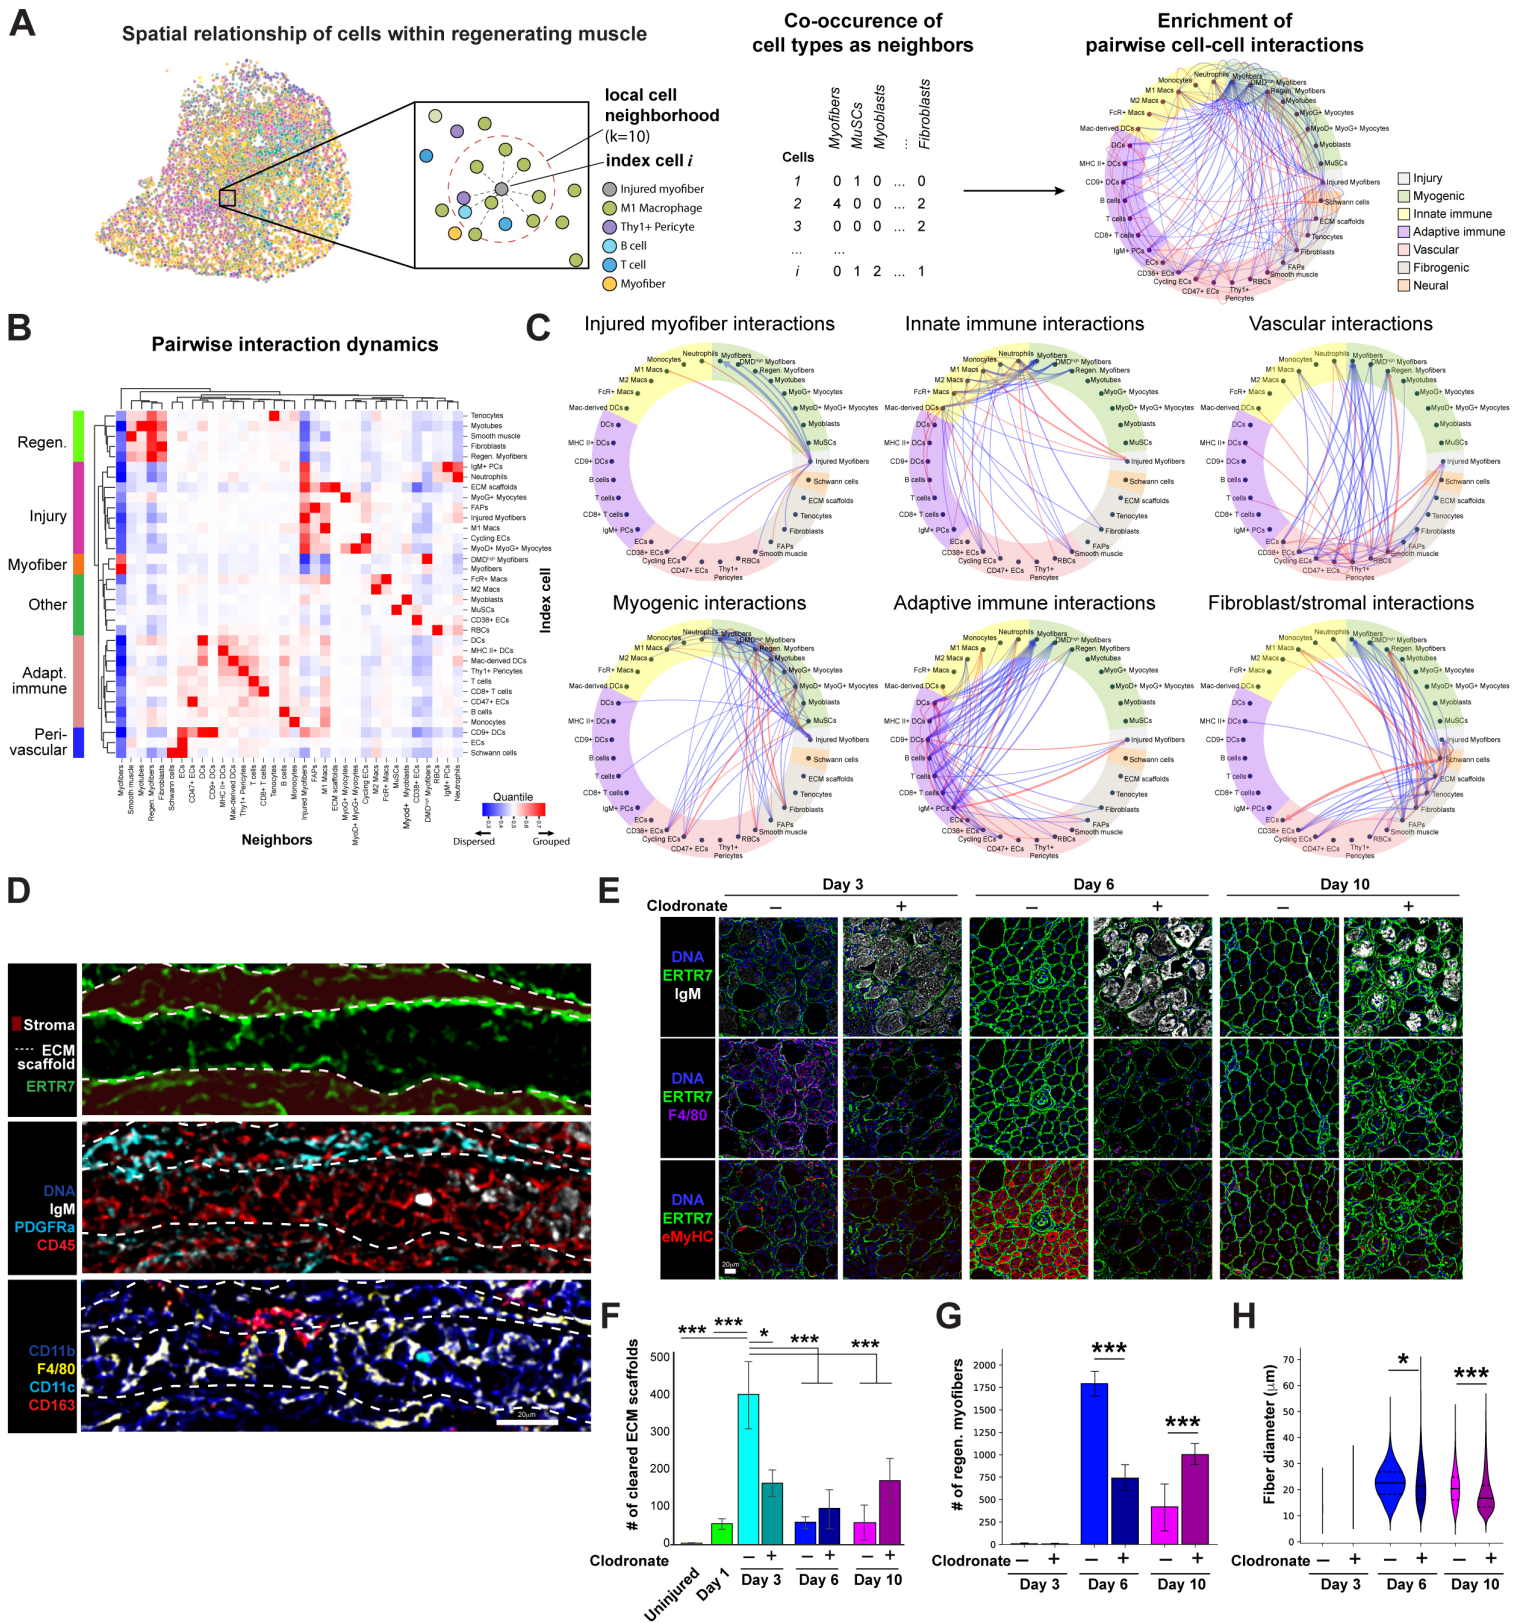

Figure 3

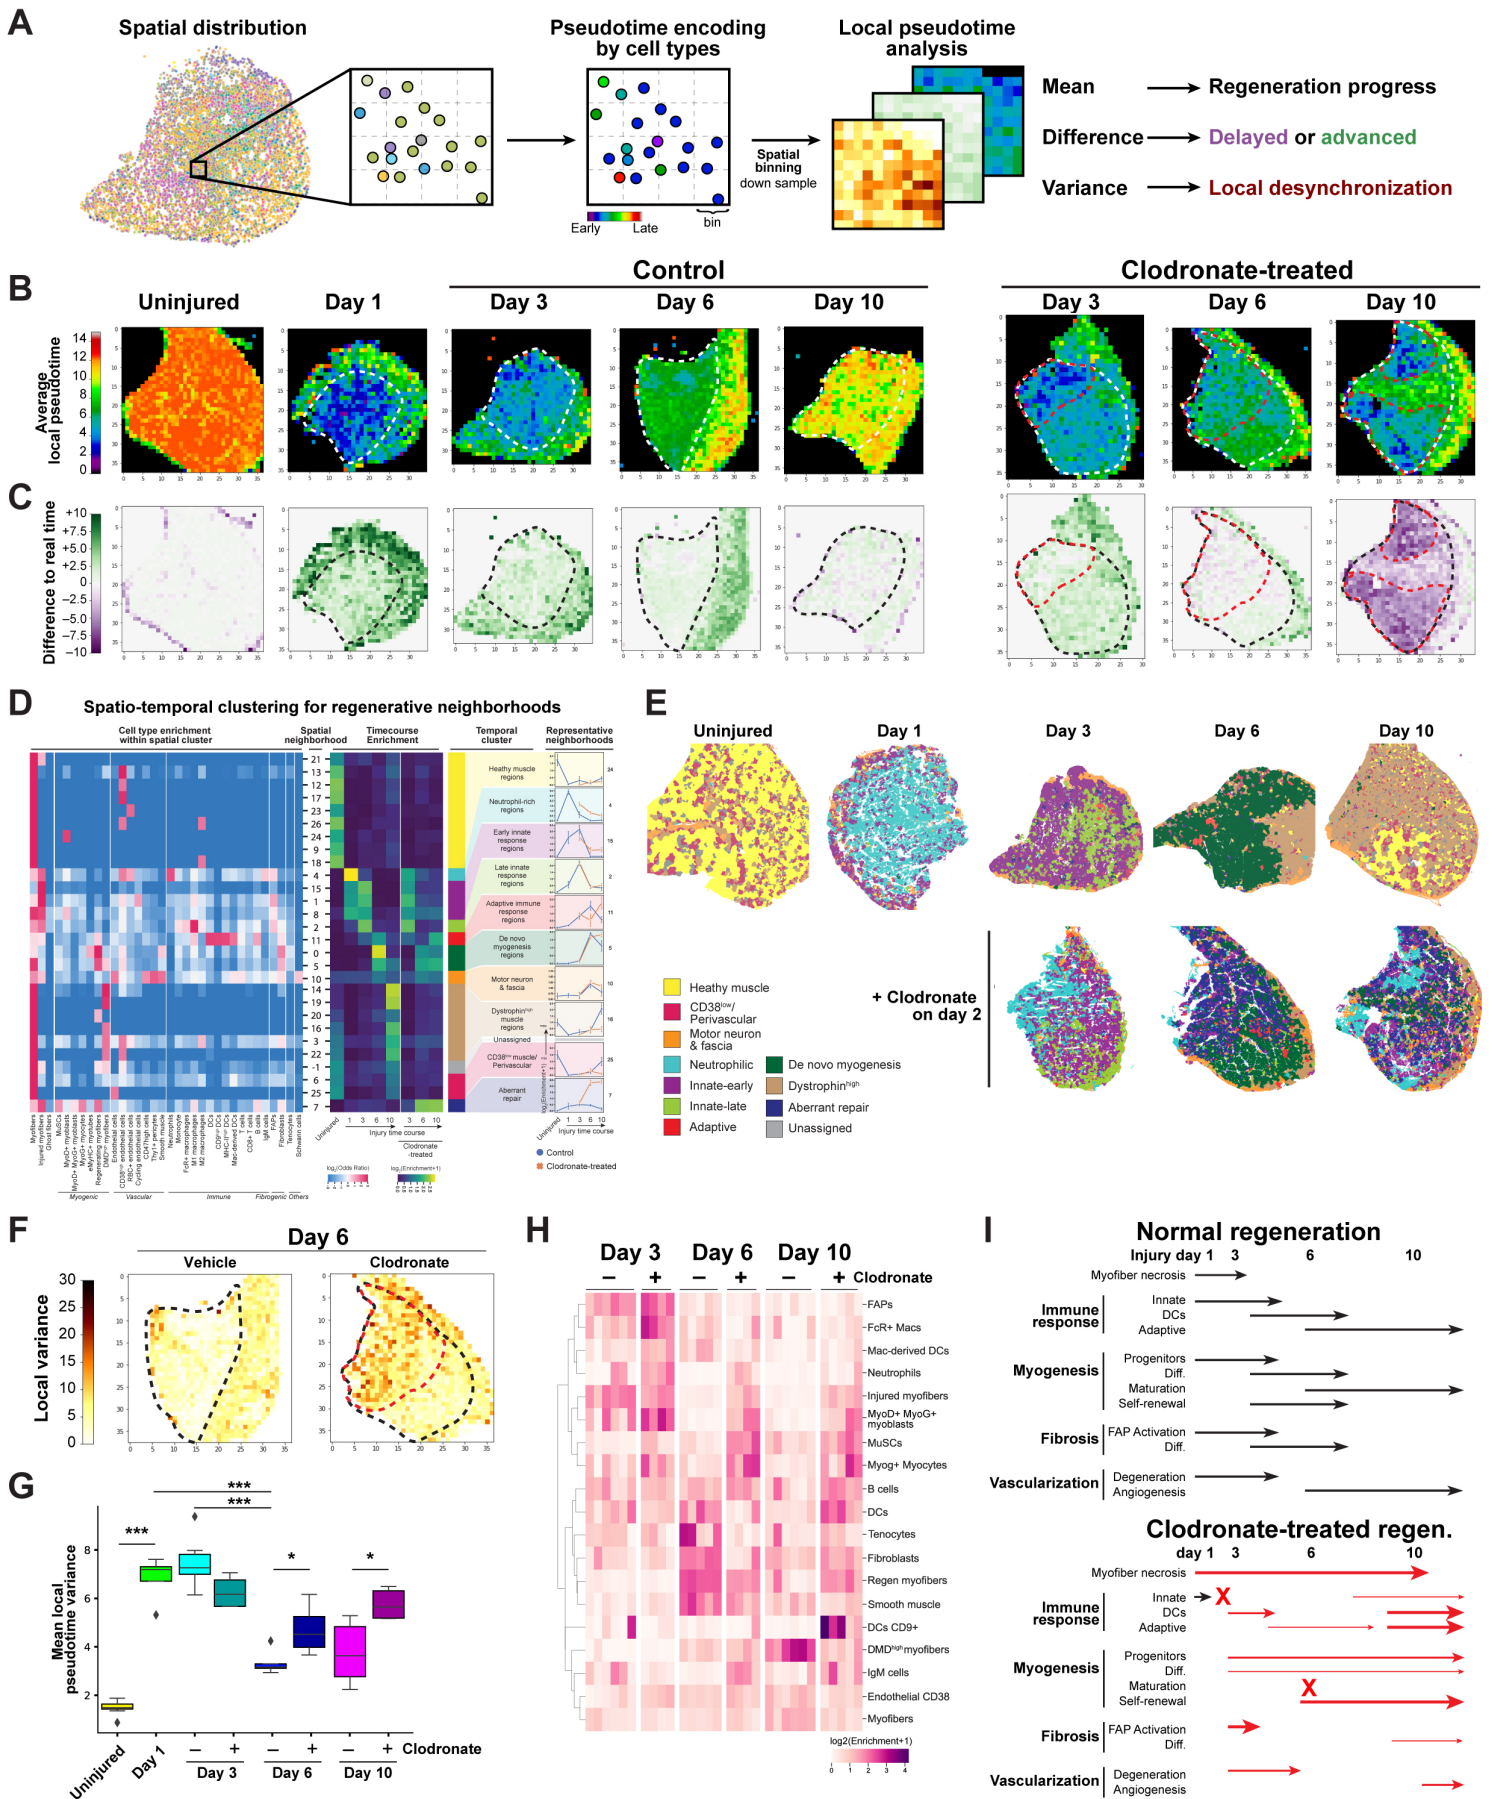

Figure 4

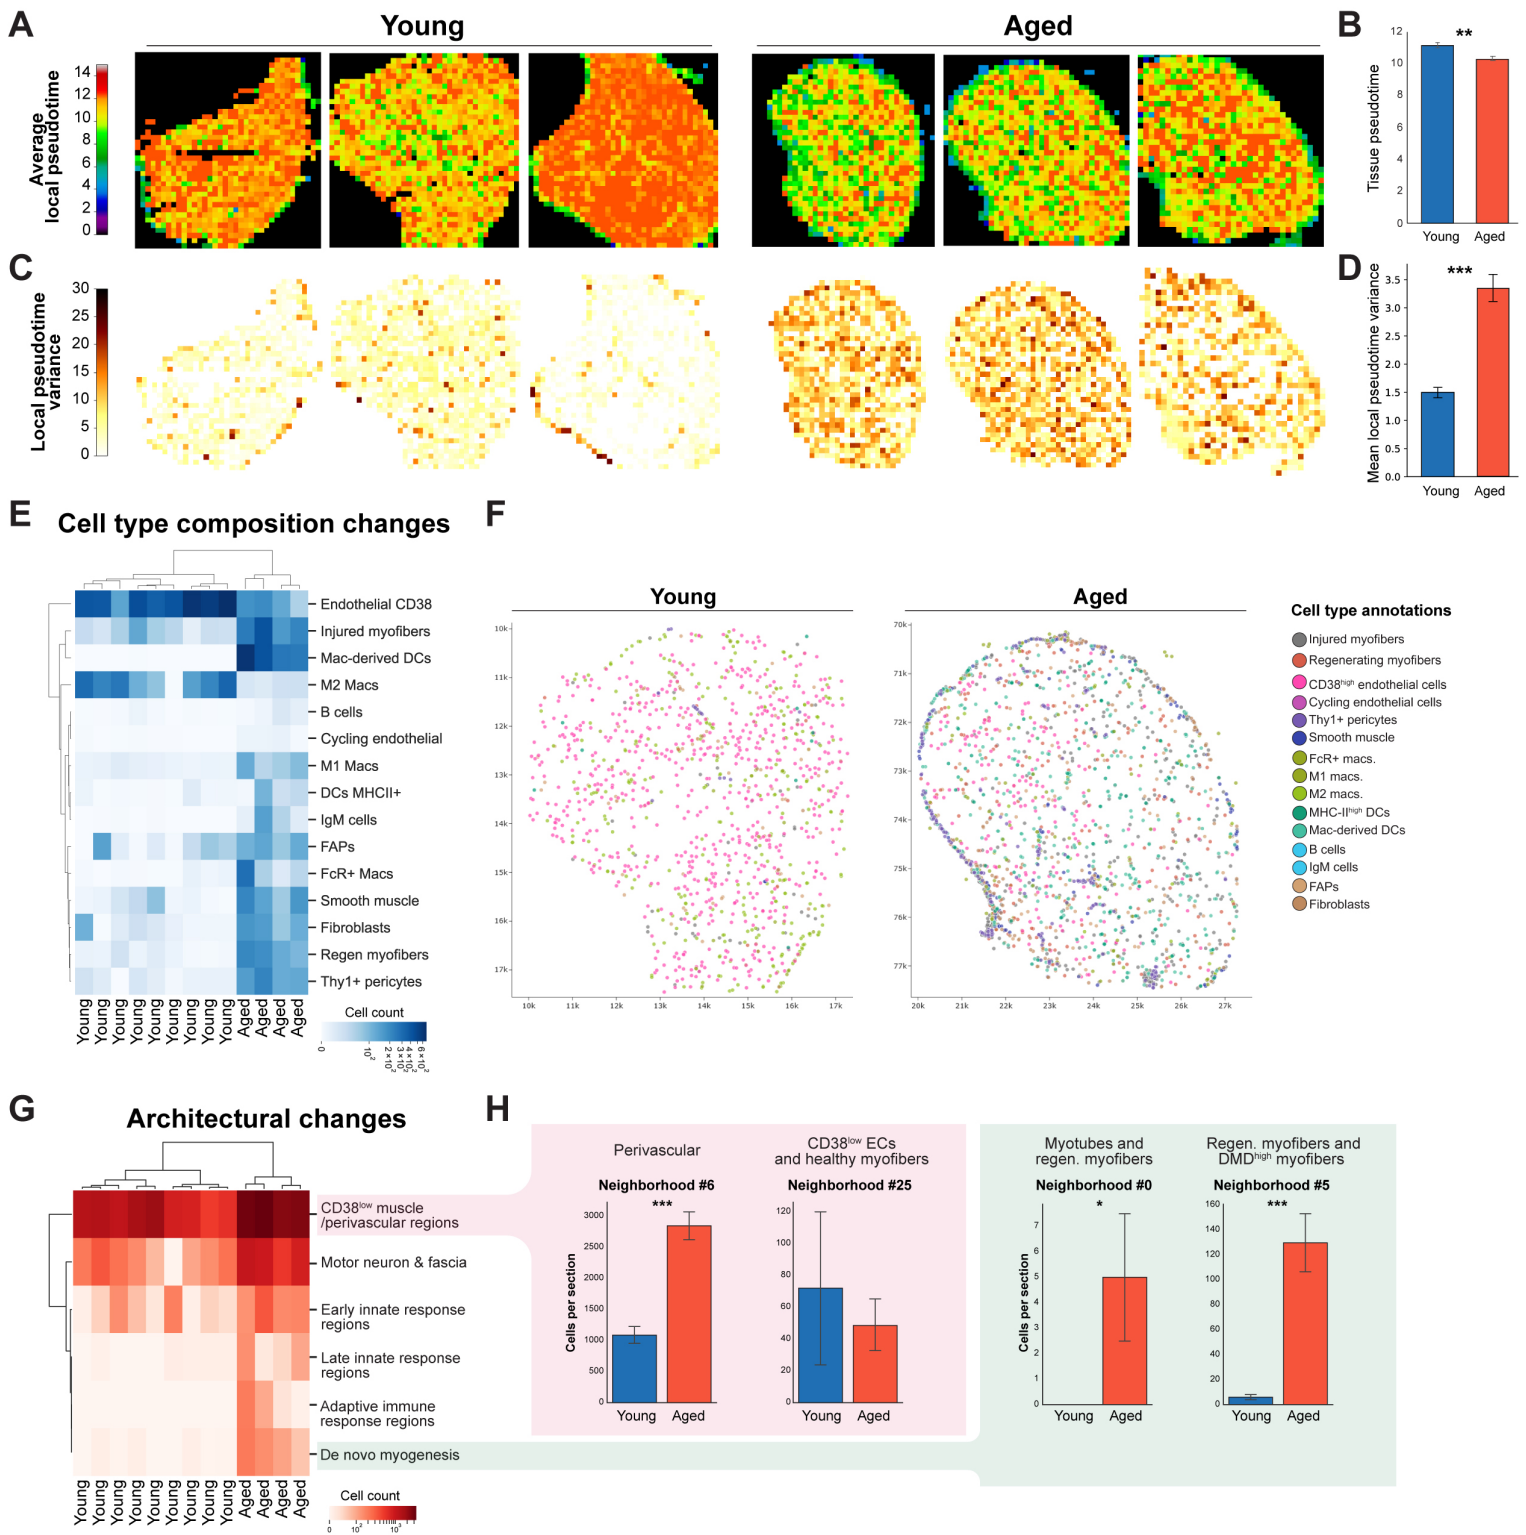

**Figure 5**

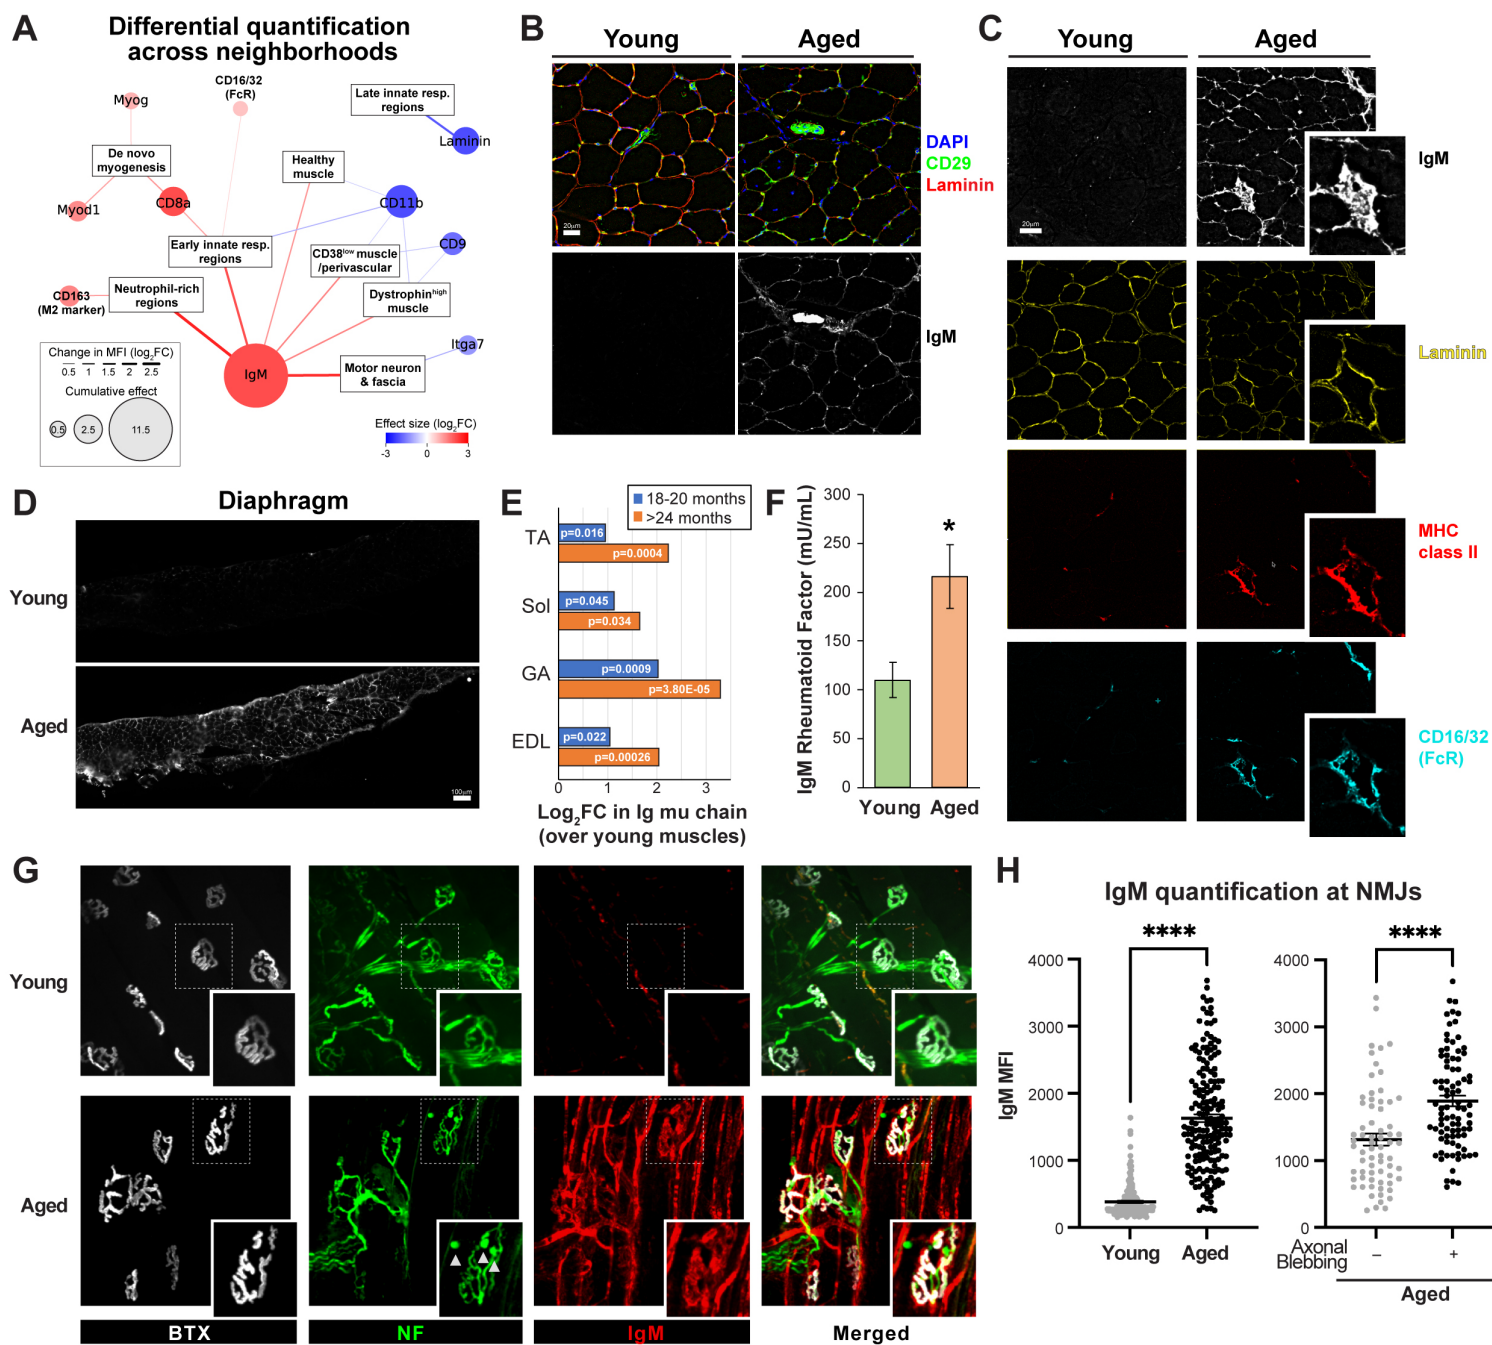

Figure 6
